# Supplementary material for: One-pot strategy of copper-catalyzed synthesis of 1,2-disubstituted benzimidazoles
Source: Royal Society of Chemistry journal article supplement (doi:10.1039/c7ob00945c), 2017-01-01
Supplement: c7ob00945c1.pdf [file c7ob00945c1.pdf]

## One –pot Strategy of Copper-catalyzed Synthesis of 1,2-

### Disubstituted Benzimidazoles

Caixia Xie,<sup>a</sup> Xushuang Han,<sup>a</sup> Jian Gong,<sup>a</sup> Danyang Li,<sup>a</sup> and Chen Ma<sup>\*a,b</sup>

<sup>a</sup>School of Chemistry and Chemical Engineering, Shandong University, Jinan, 250100, P. R. China.

<sup>b</sup>State Key Laboratory of Bioactive Substance and Function of Natural Medicines, Institute of Materia Medica, Chinese Academy of Medical Sciences and Peking Union Medical College, Beijing, 100050, P. R. China.

## Supporting Information

### Table of contents

|                                                                       |               |
|-----------------------------------------------------------------------|---------------|
| <b>1. Preparation of starting materials.....</b>                      | <b>S2</b>     |
| <b>2. <sup>1</sup>H NMR, <sup>13</sup>C NMR and HRMS spectra.....</b> | <b>S2-S34</b> |
| <b>3. Reference.....</b>                                              | <b>S34</b>    |

## 1. Preparation of starting materials

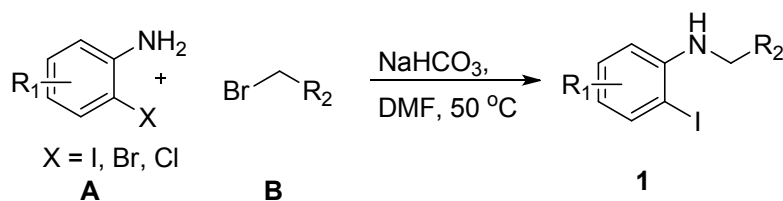

**Scheme 1**

*N*-benzyl-2-halogen anilines were prepared according to a modified literature procedure.<sup>1</sup> An oven-dried flask was charged with compounds **A** (5 mmol), the corresponding benzyl bromide **B** (6 mmol), NaHCO<sub>3</sub> (10 mmol), and DMF (15 mL). The mixture was stirred at 50 °C until complete consumption of starting material was indicated by TLC. Then the mixture was cooled to room temperature and quenched with Brine and the organic layer extracted with ethyl acetate. The combined extracts were washed with brine and dried over Na<sub>2</sub>SO<sub>4</sub>, concentrated under reduced pressure and purified by column chromatography to afford the pure product **1**.

## 2. <sup>1</sup>H NMR, <sup>13</sup>C NMR and HRMS spectra

### 1-Benzyl-2-phenyl-1*H*-benzo[d]imidazole (3a).

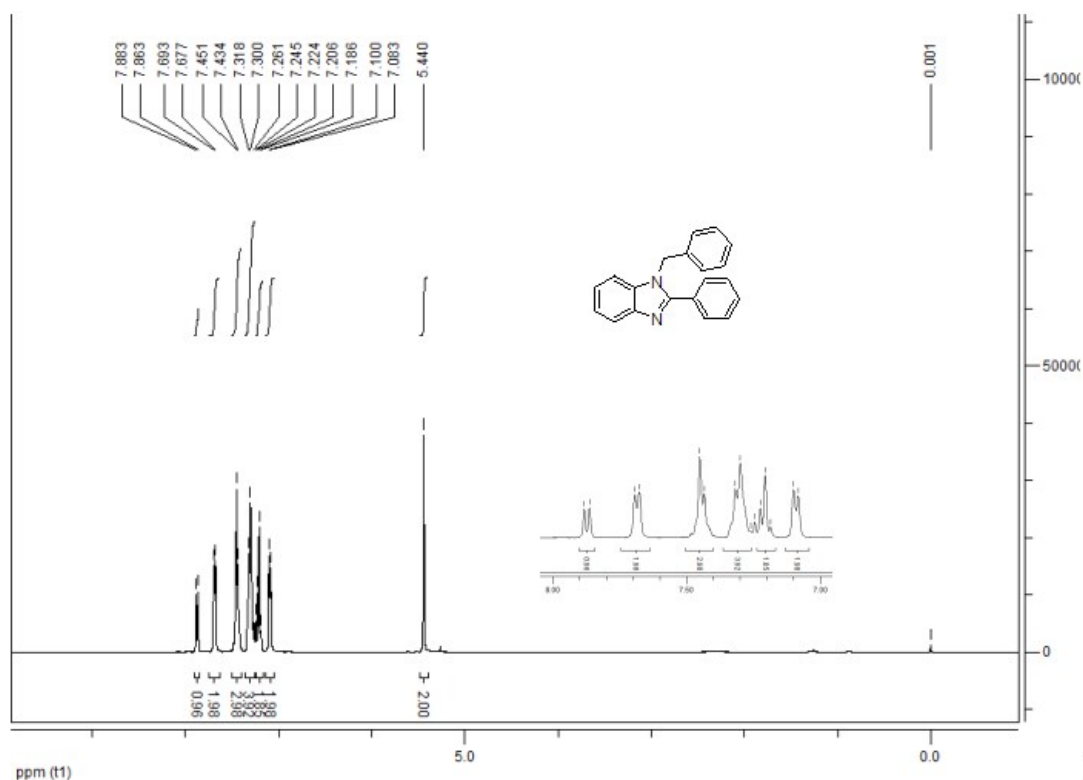

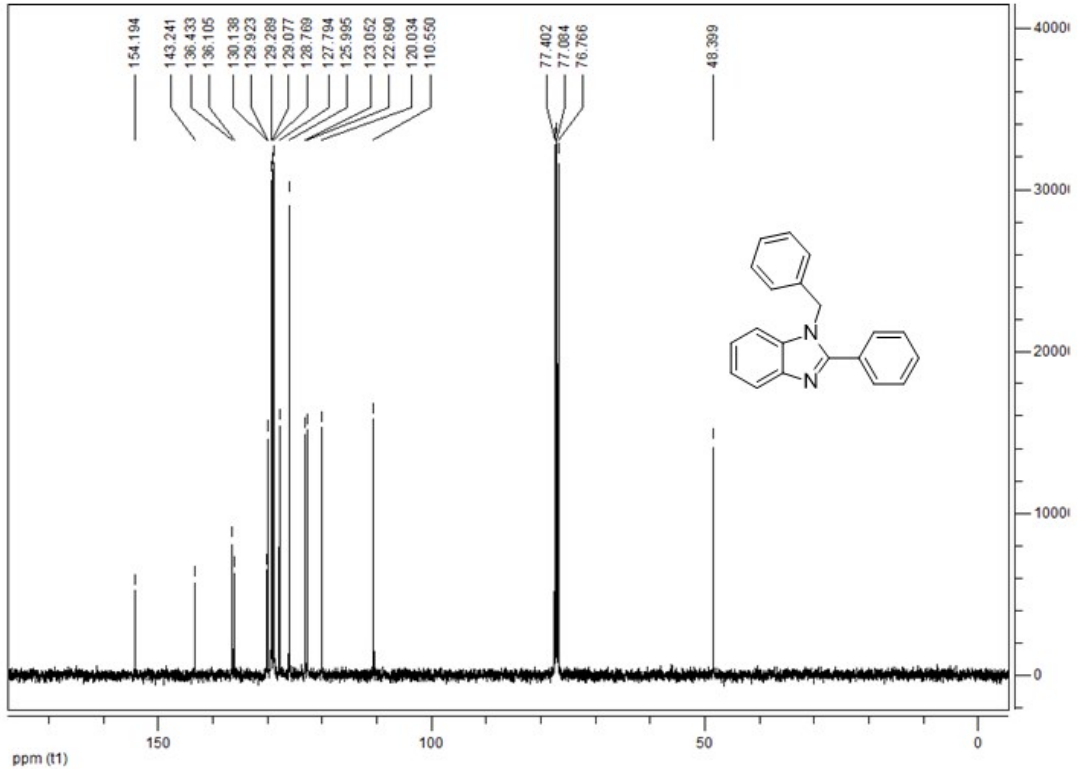

**1-Benzyl-5-chloro-2-phenyl-1H-benzimidazole (3b)**

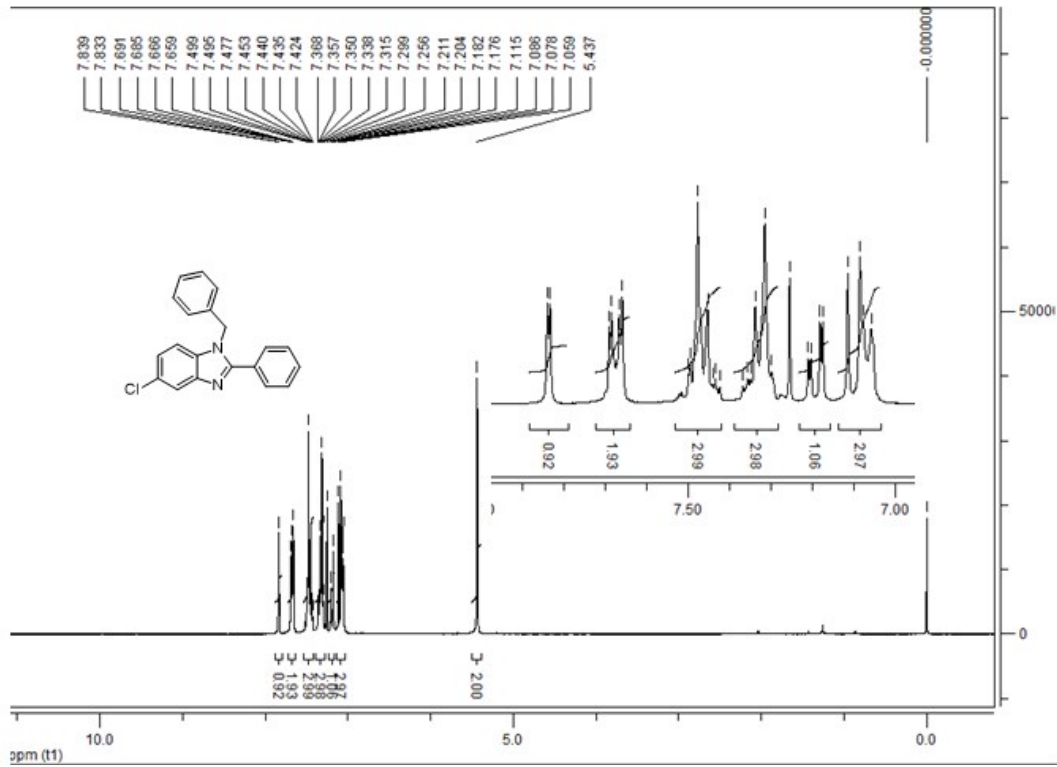

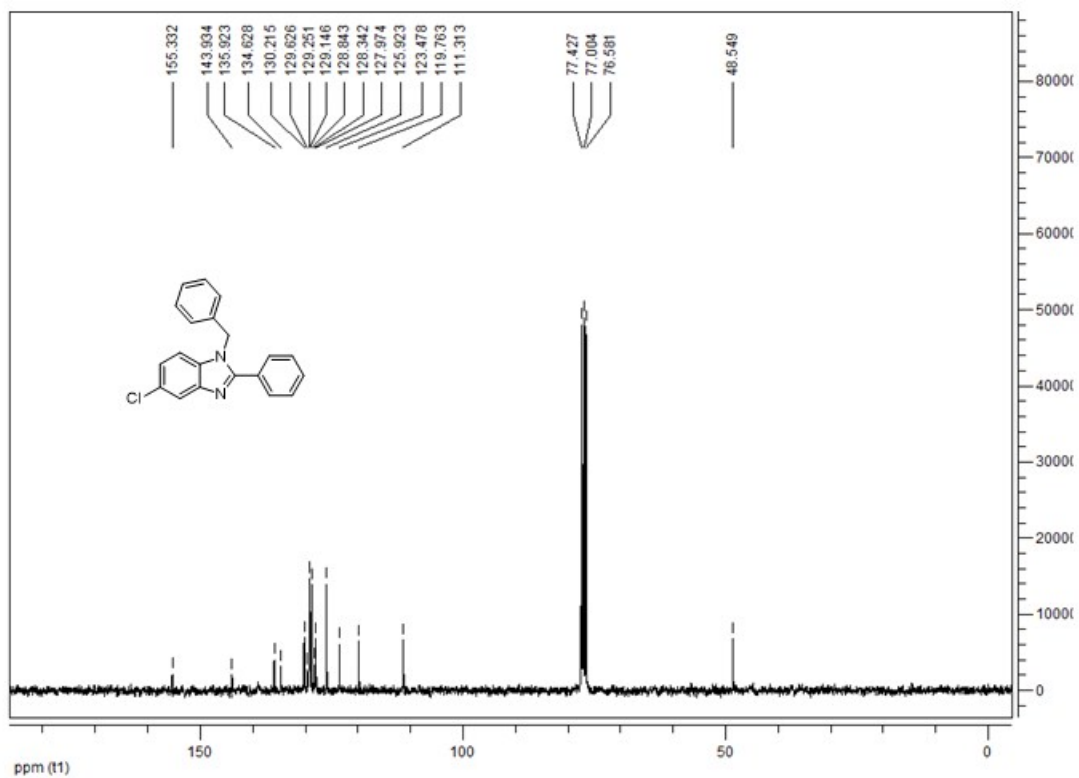

1-Benzyl-5-fluoro-2-phenyl-1H-benzimidazole (3c)

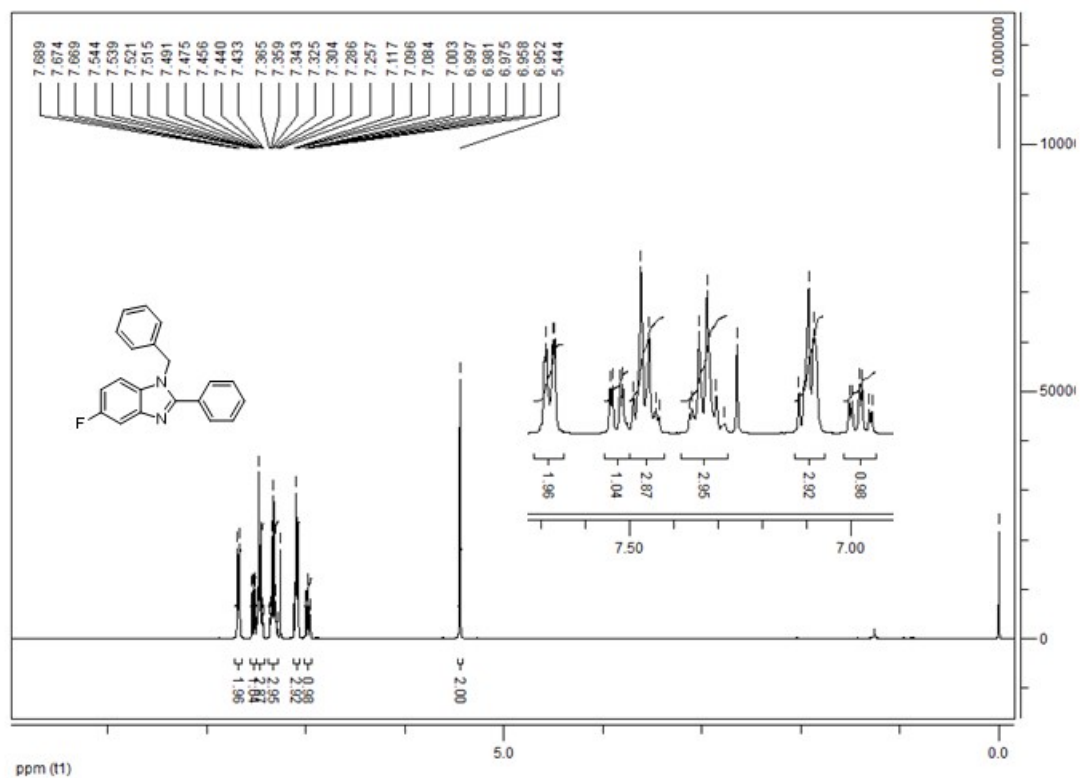

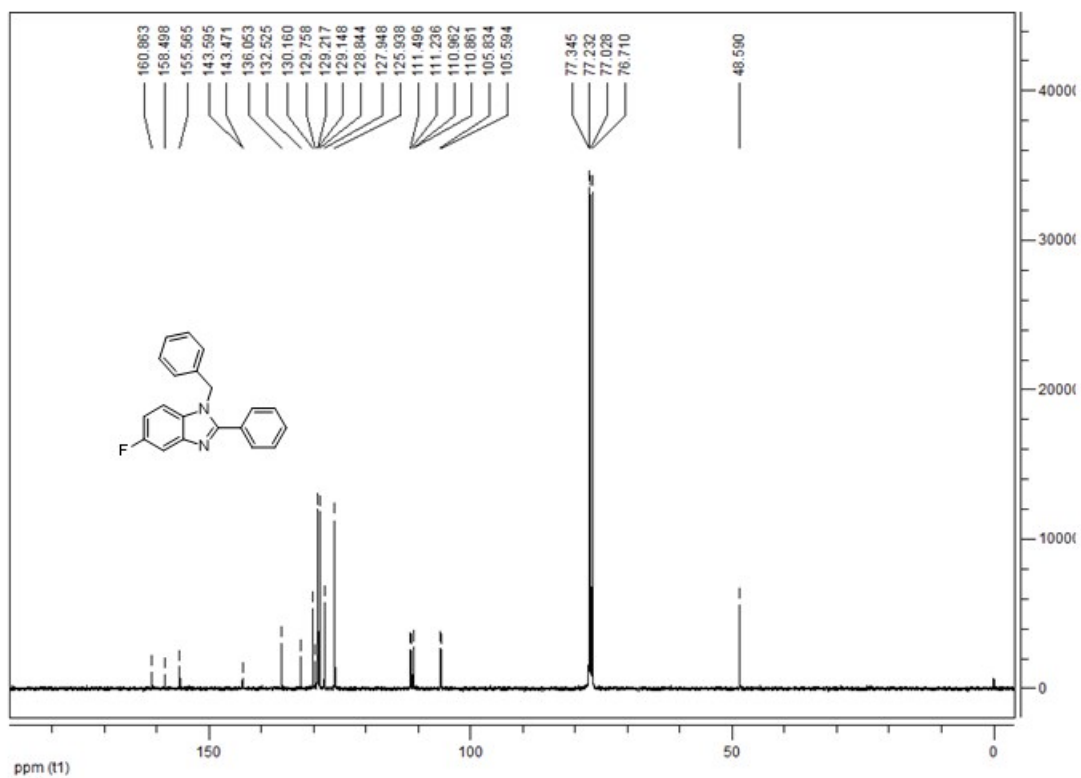

**1-Benzyl-2-phenyl-5-(trifluoromethyl)-1H-benzo[d]imidazole (3d)**

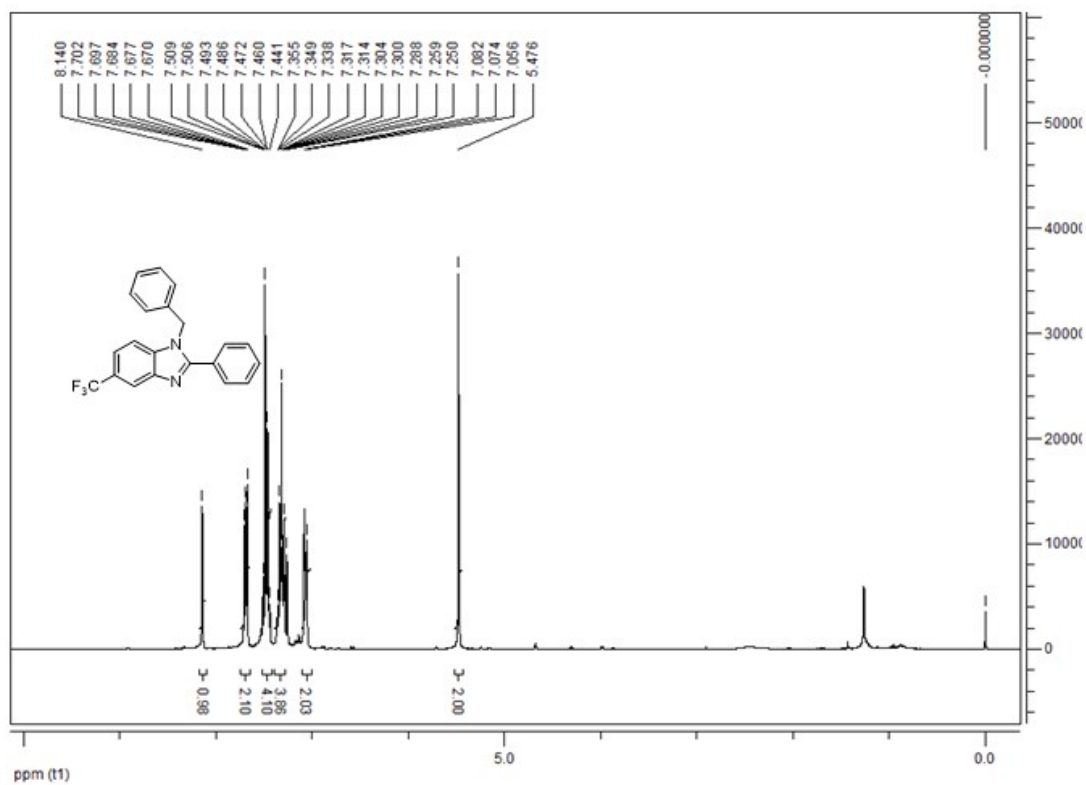

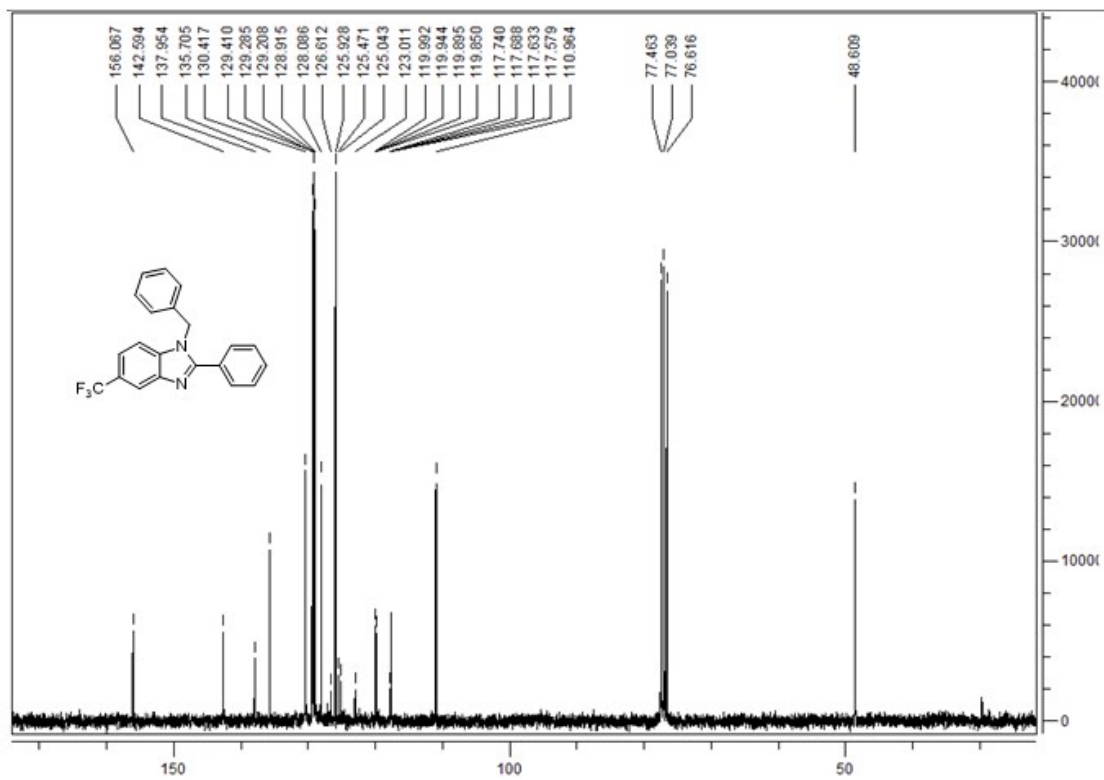

1-Benzyl-6-chloro-2-phenyl-1H-benzo[d]imidazole (3e)

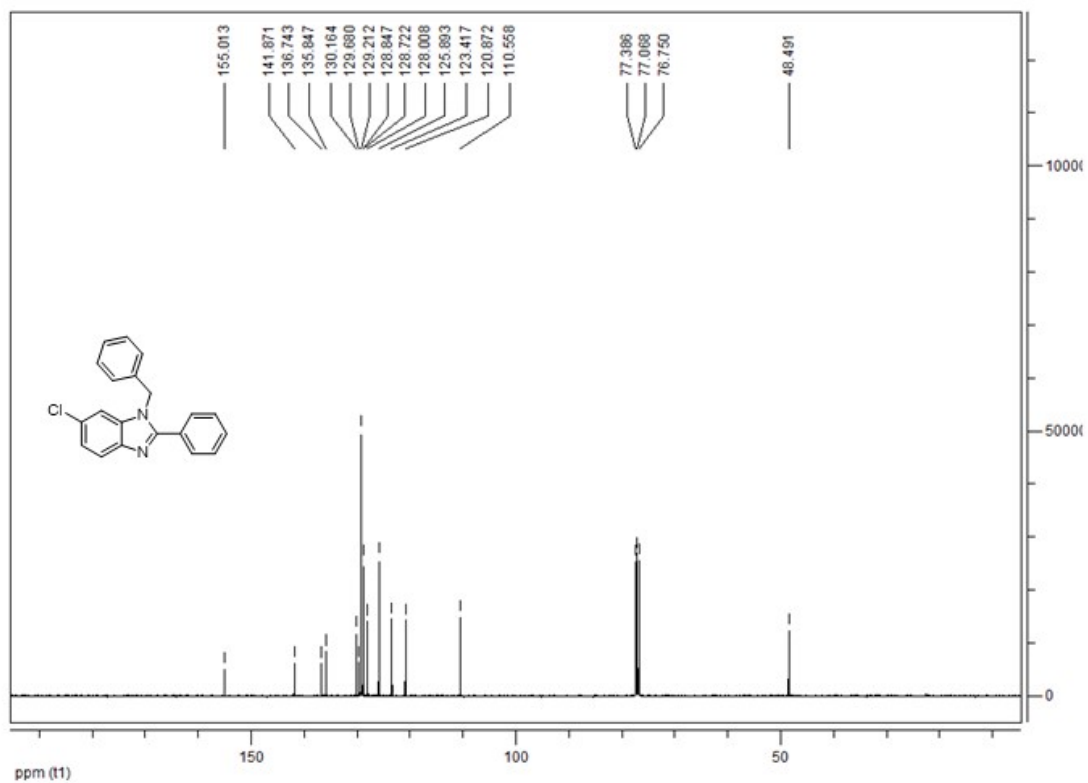

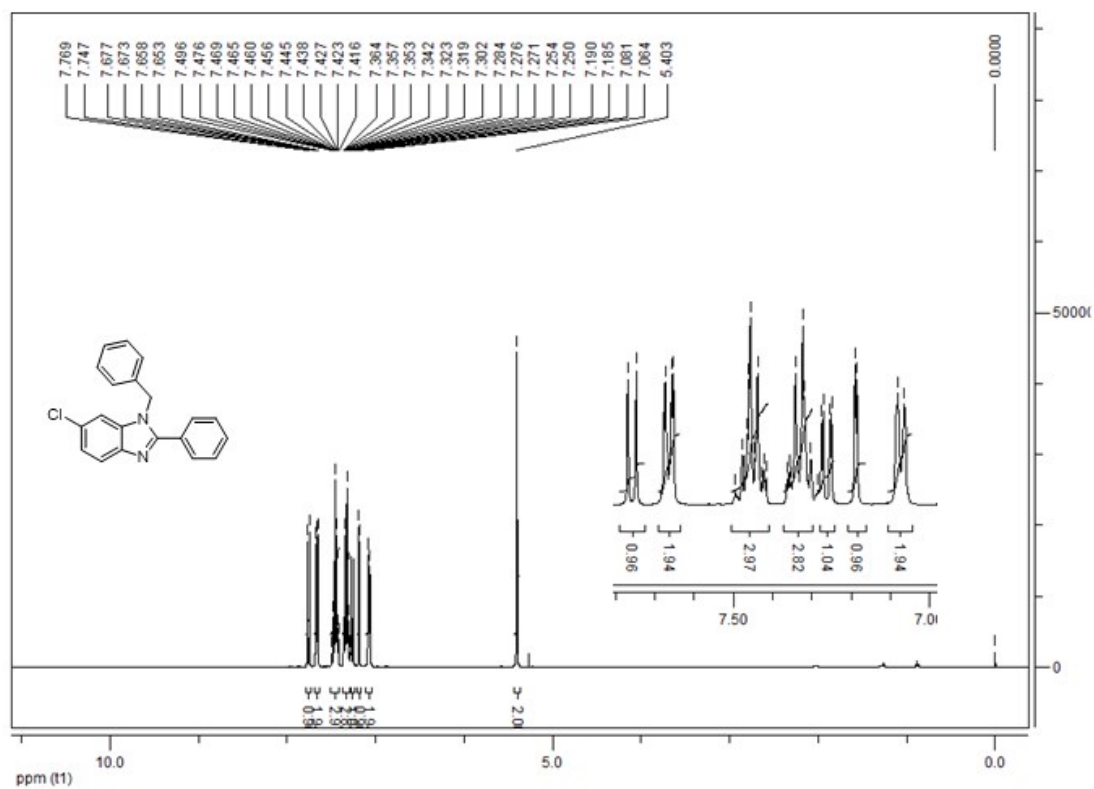

**1-Benzyl-5-methyl-2-phenyl-1H-benzo[*d*]imidazole (3f)**

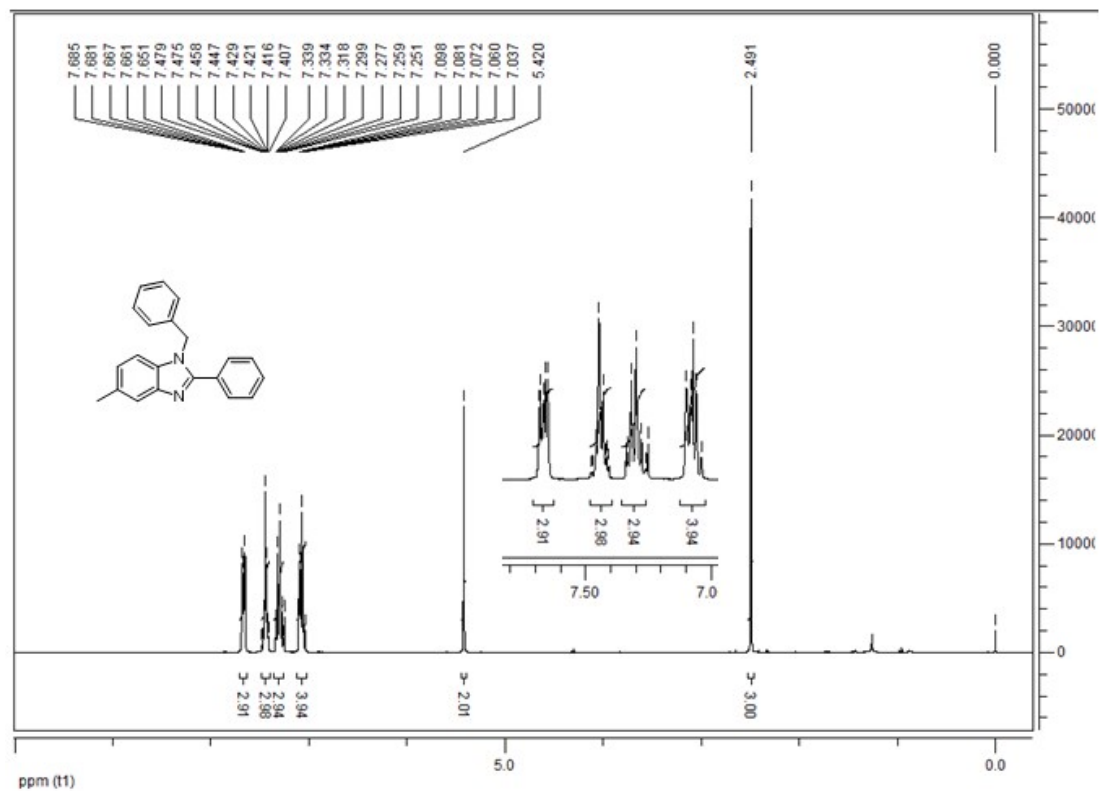

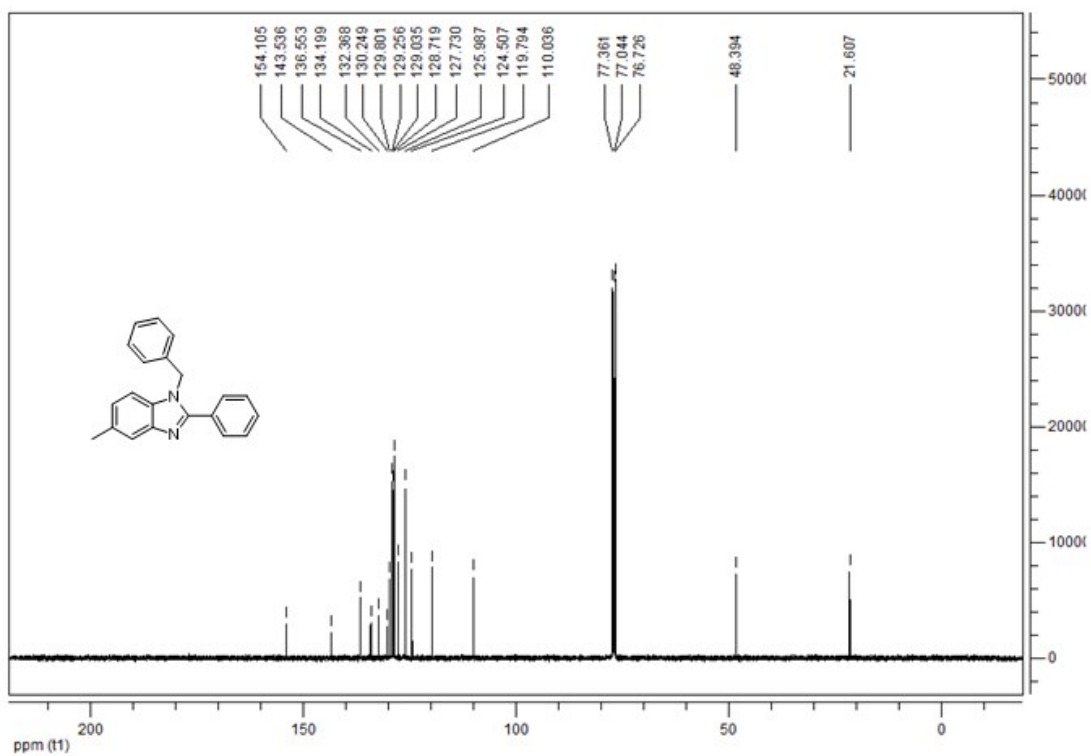

1-Benzyl-6-methyl-2-phenyl-1H-benzo[d]imidazole (3g).

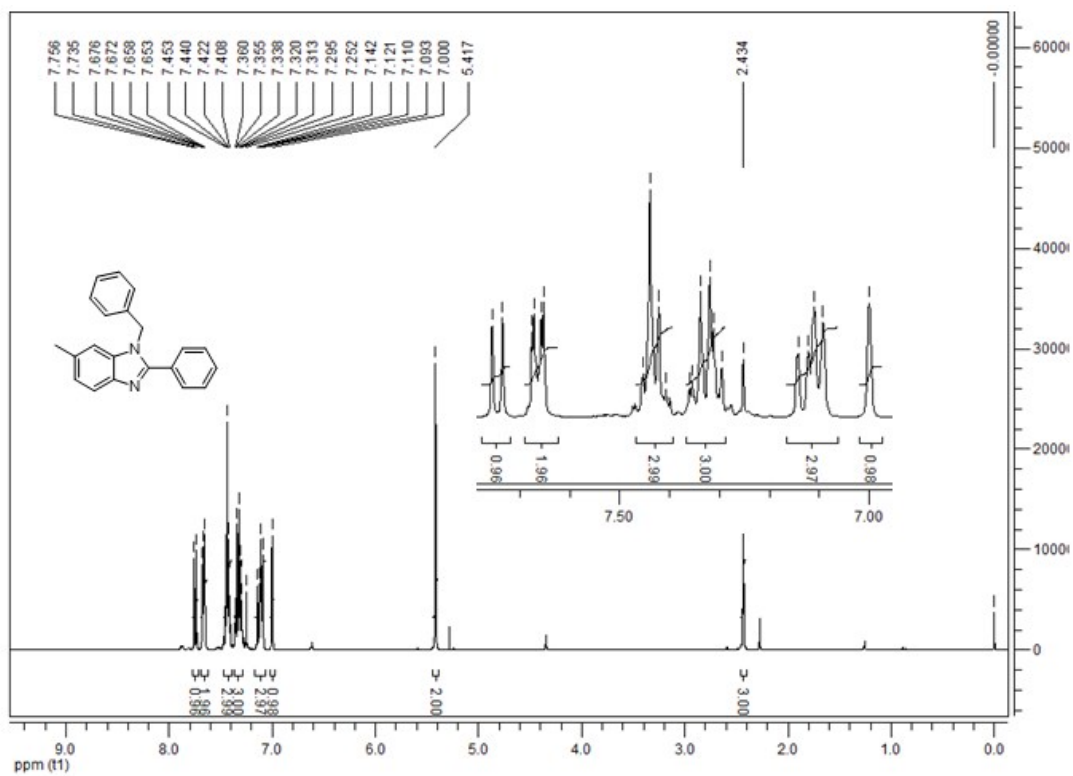



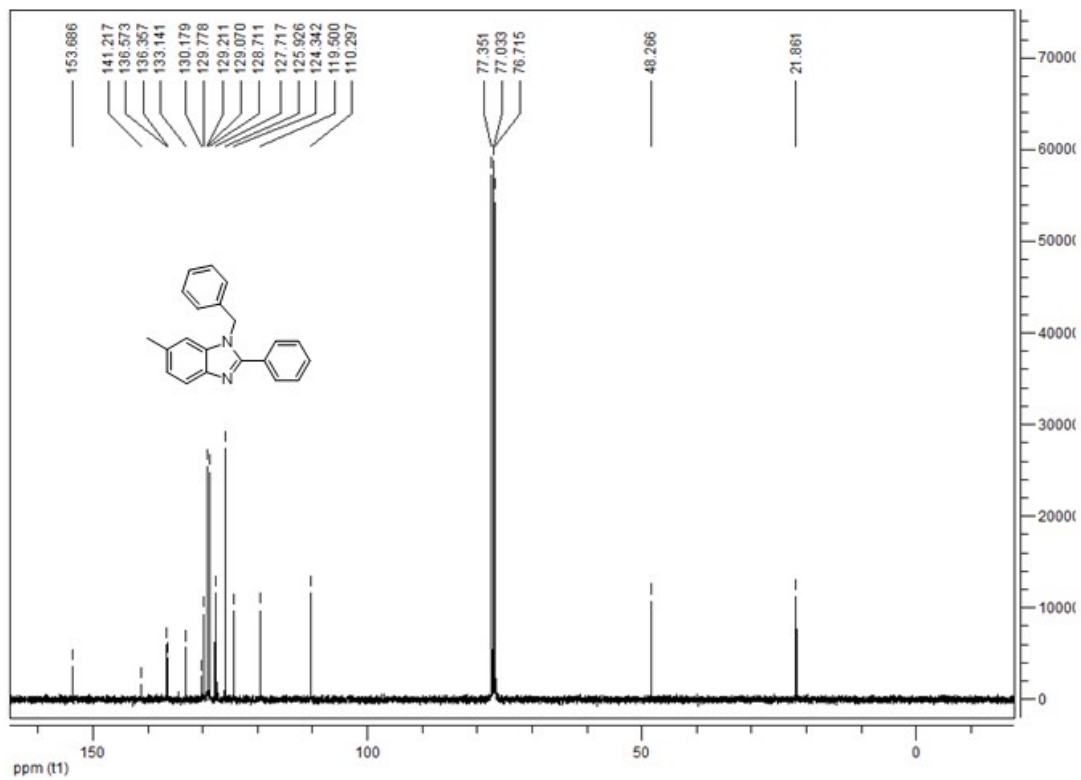

1-Benzyl-5-bromo-2-phenyl-1H-benzo[d]imidazole (3h)

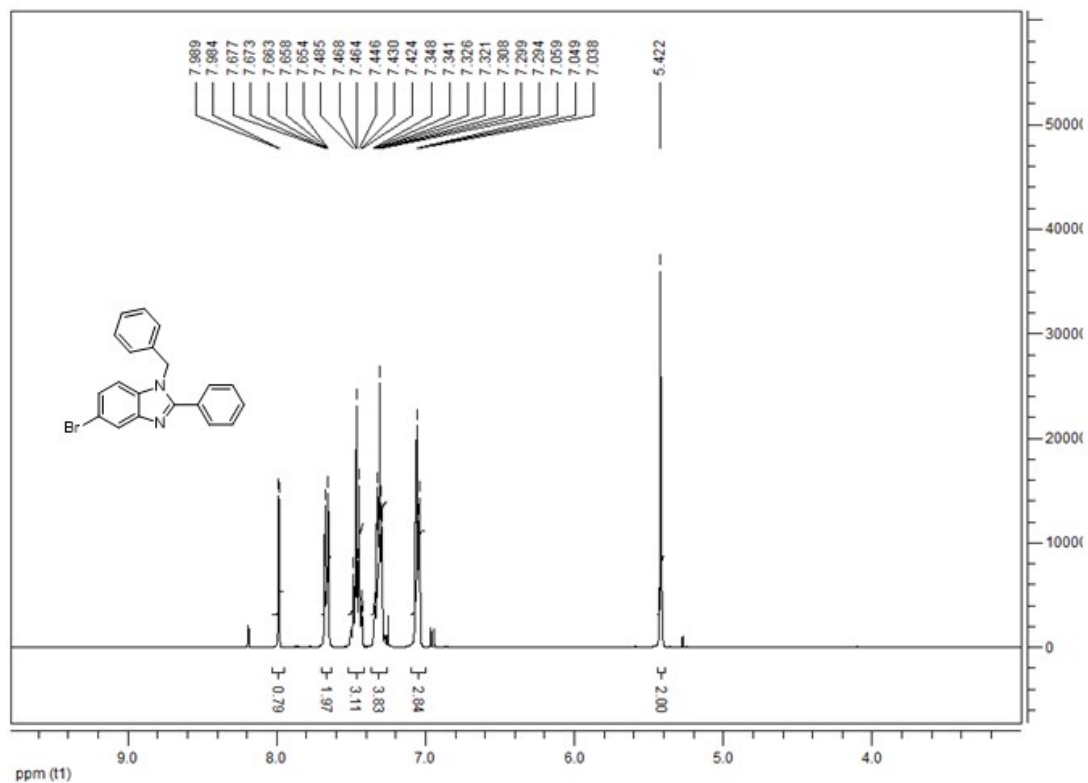

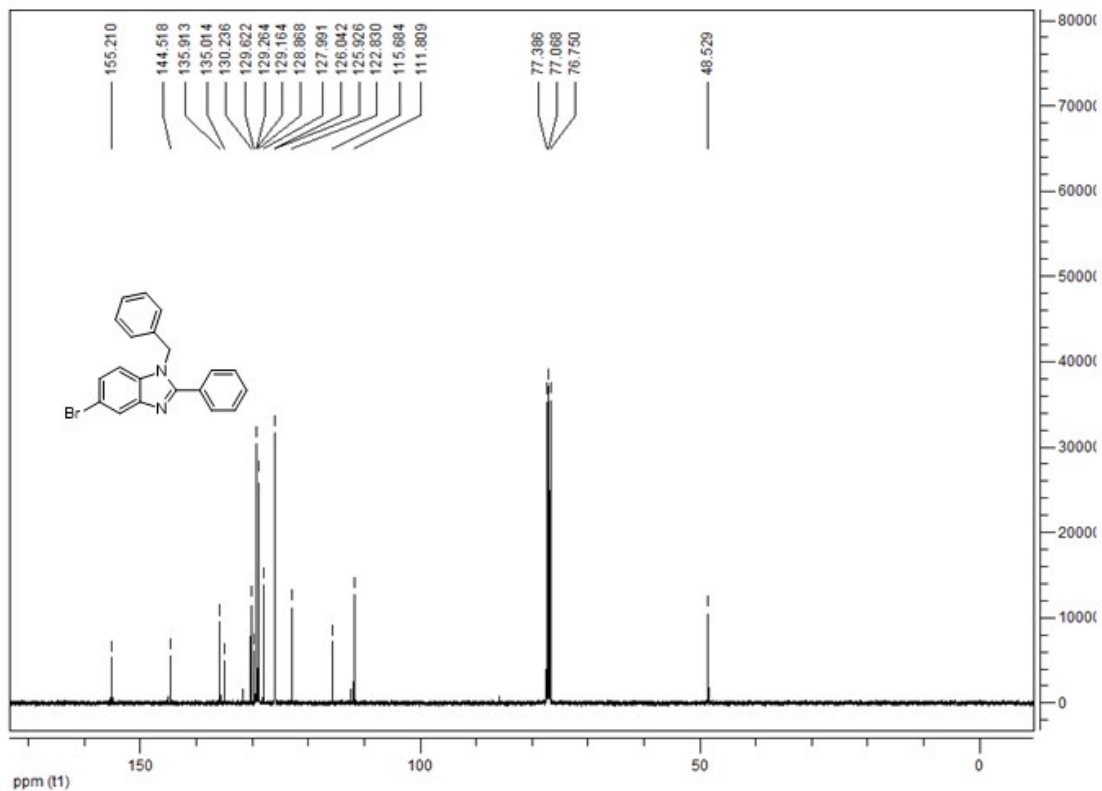

**1-Benzyl-2-phenyl-1H-benzo[d]imidazole-5-carbonitrile (3i)**

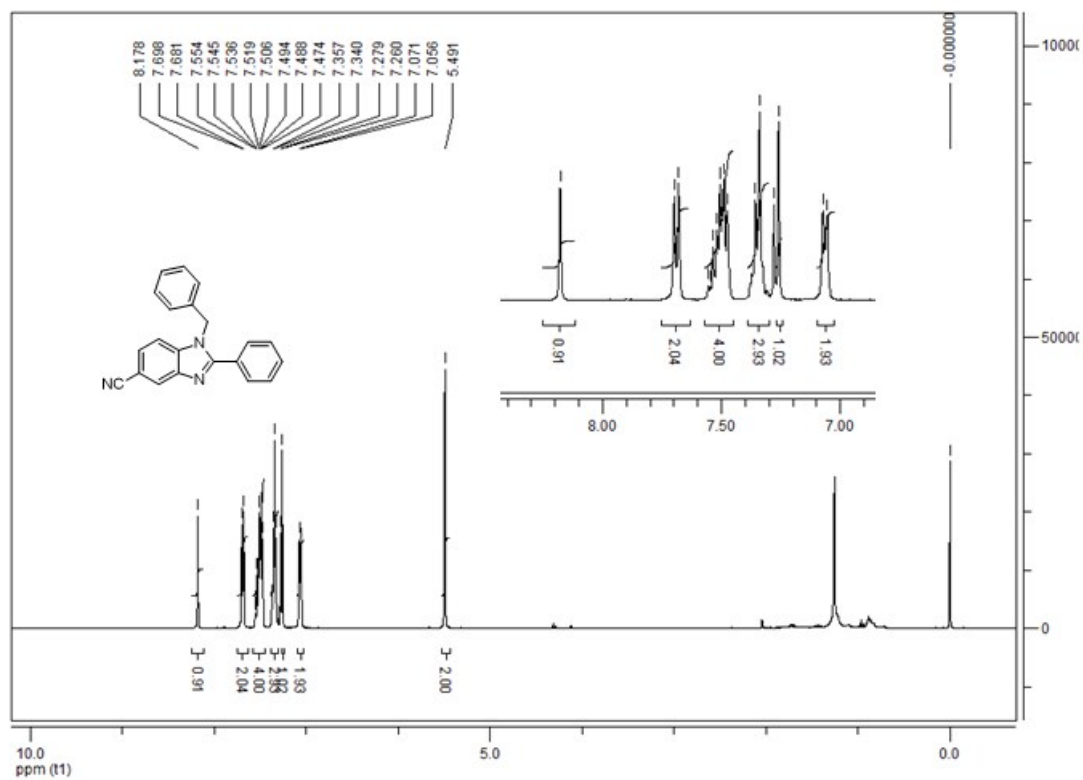

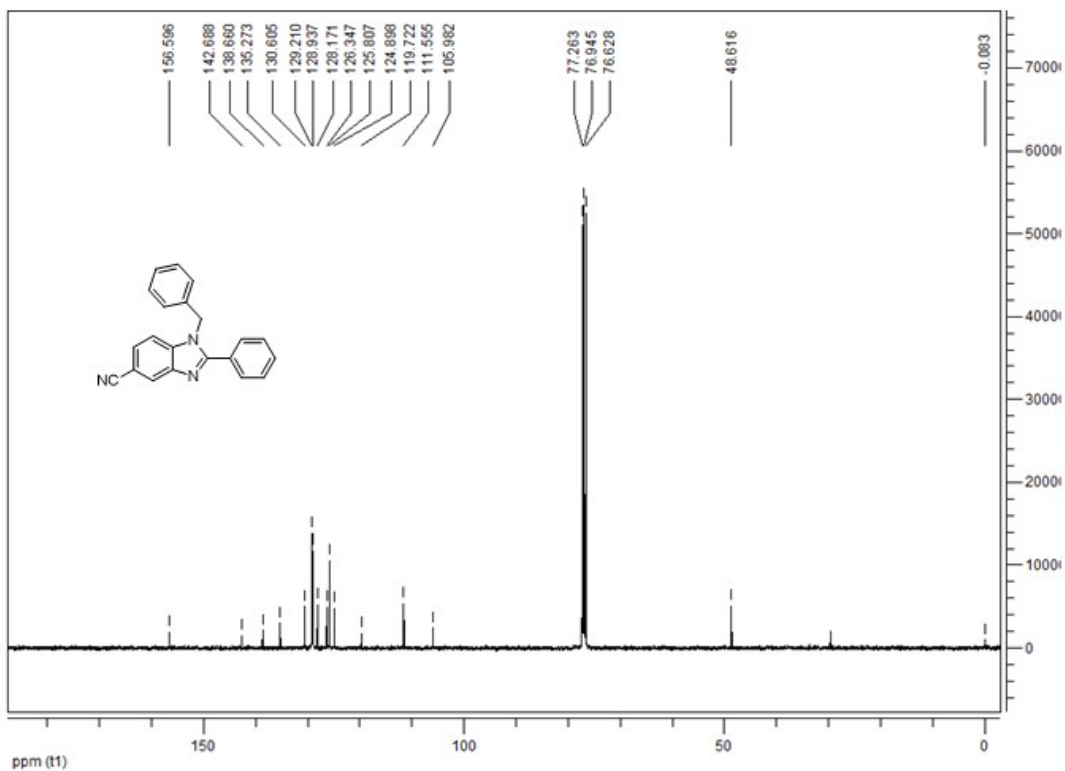

1-(4-Methylbenzyl)-2-phenyl-1H-benzimidazole (3j)

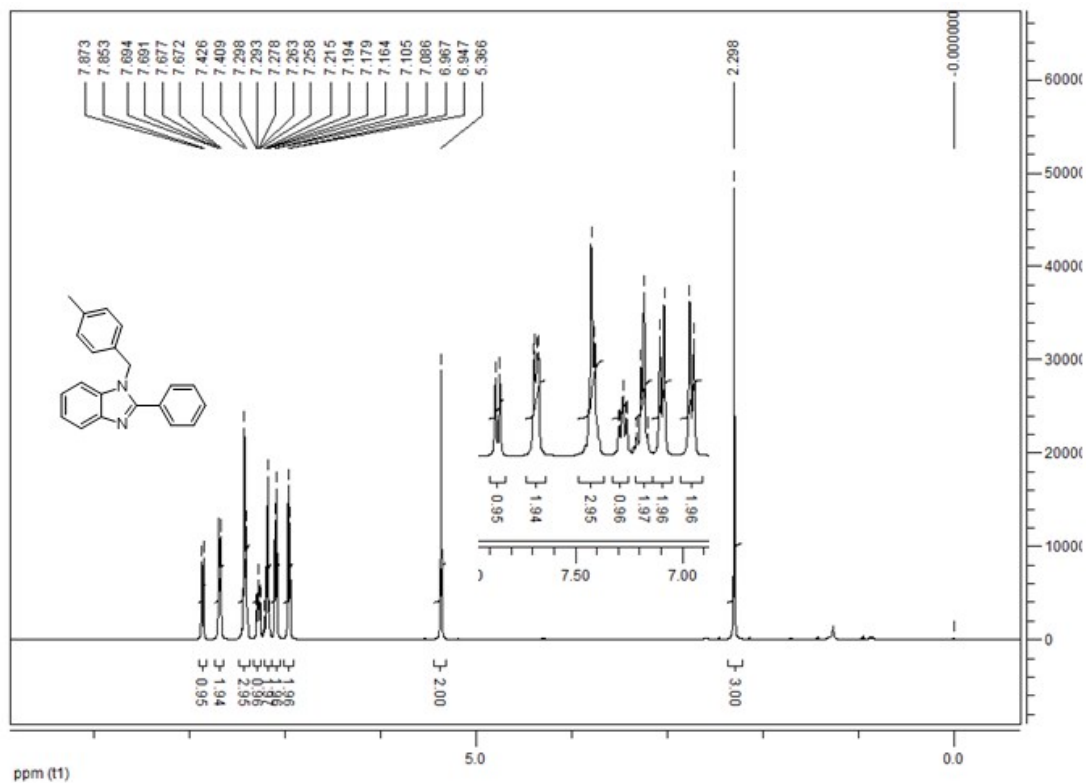

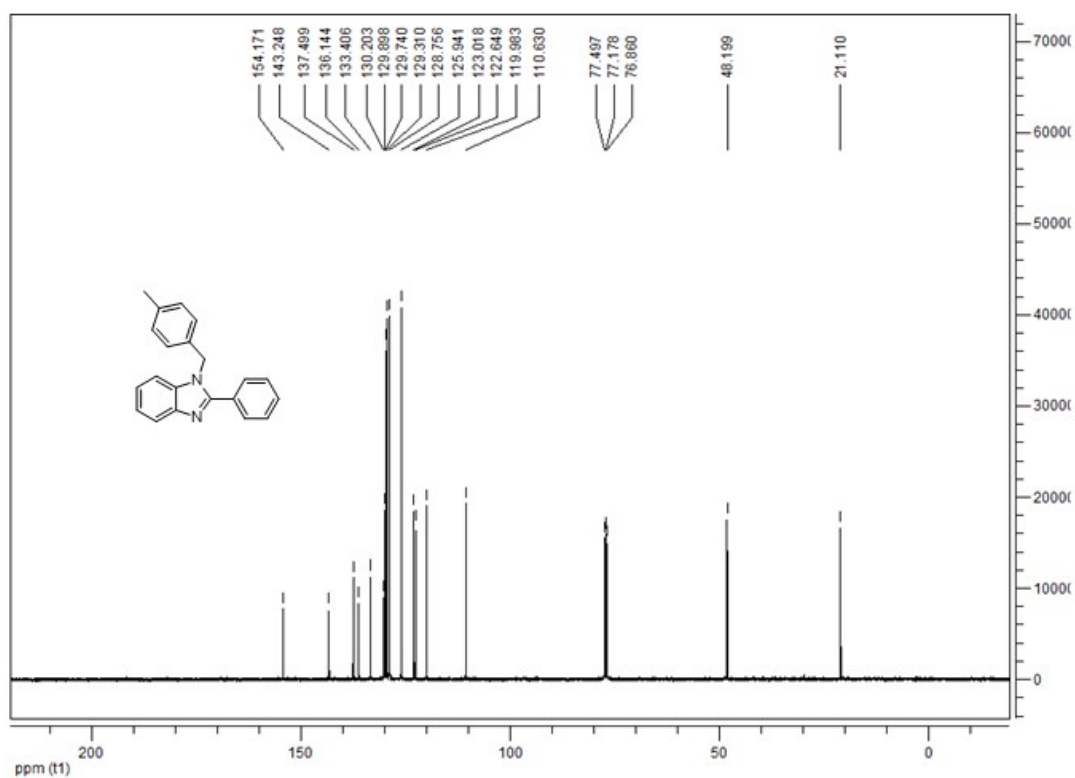

**1-(3-Methylbenzyl)-2-phenyl-1H-benzo[d]imidazole (3k)**

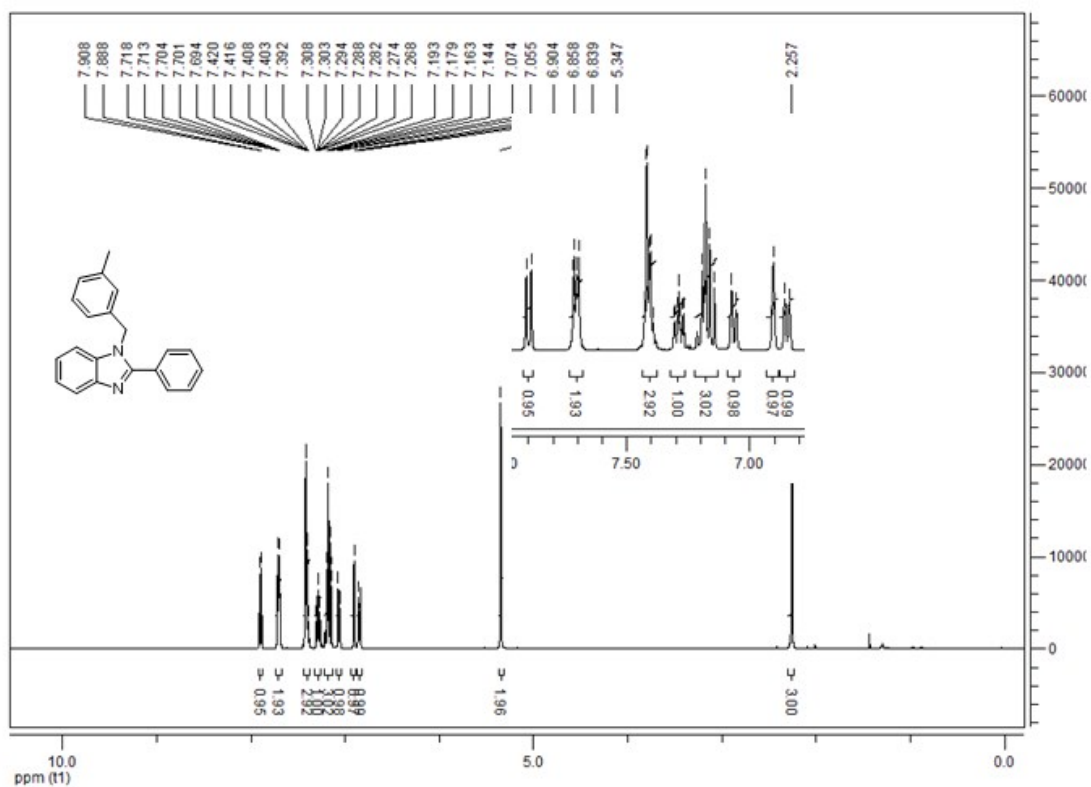

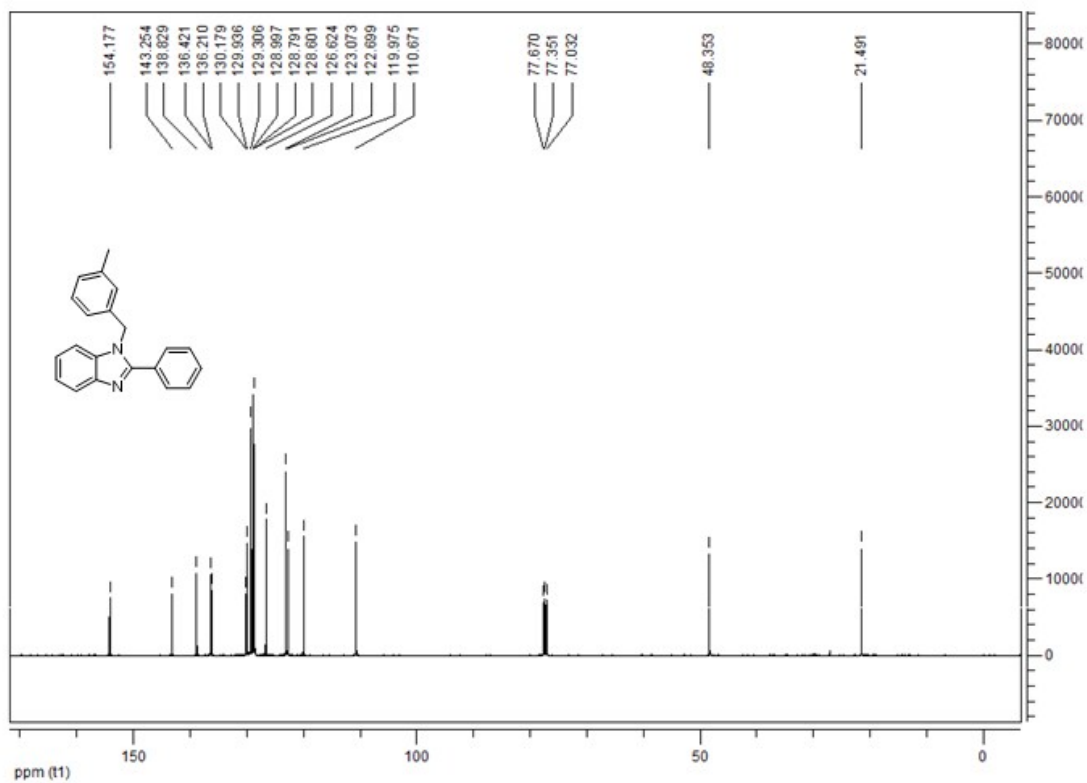

**1-(4-(Tert-butyl)benzyl)-2-phenyl-1H-benzo[d]imidazole (3I)**

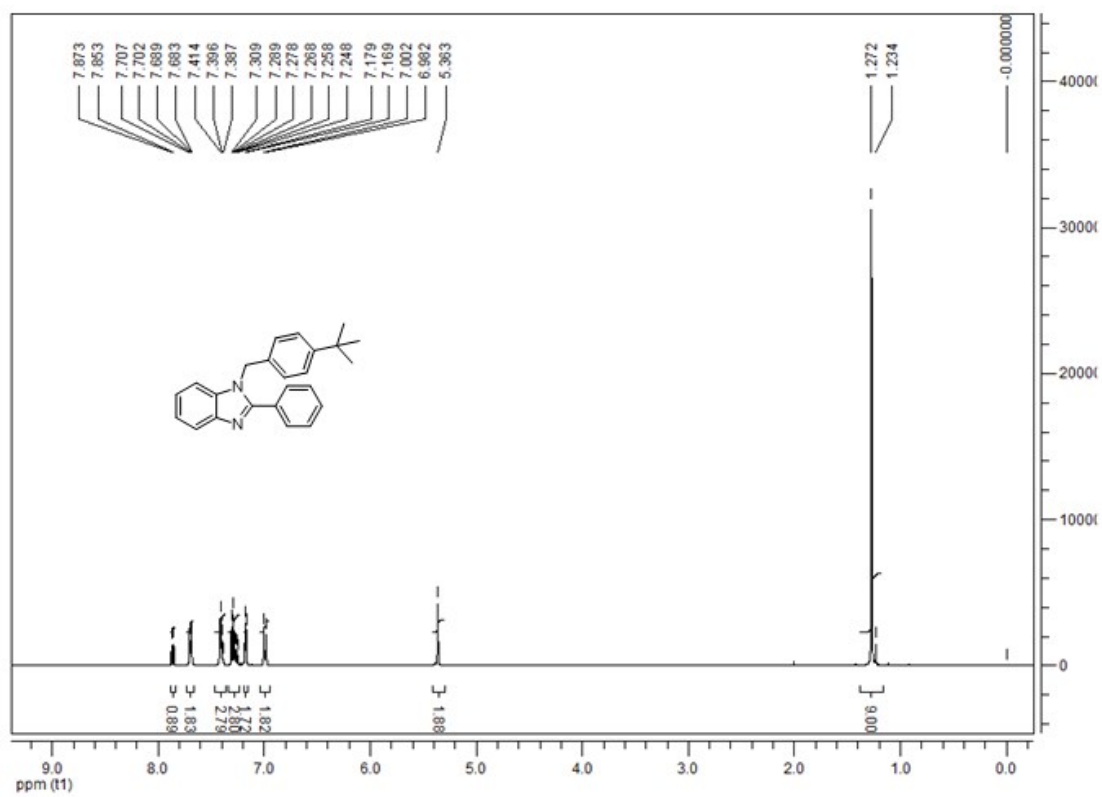

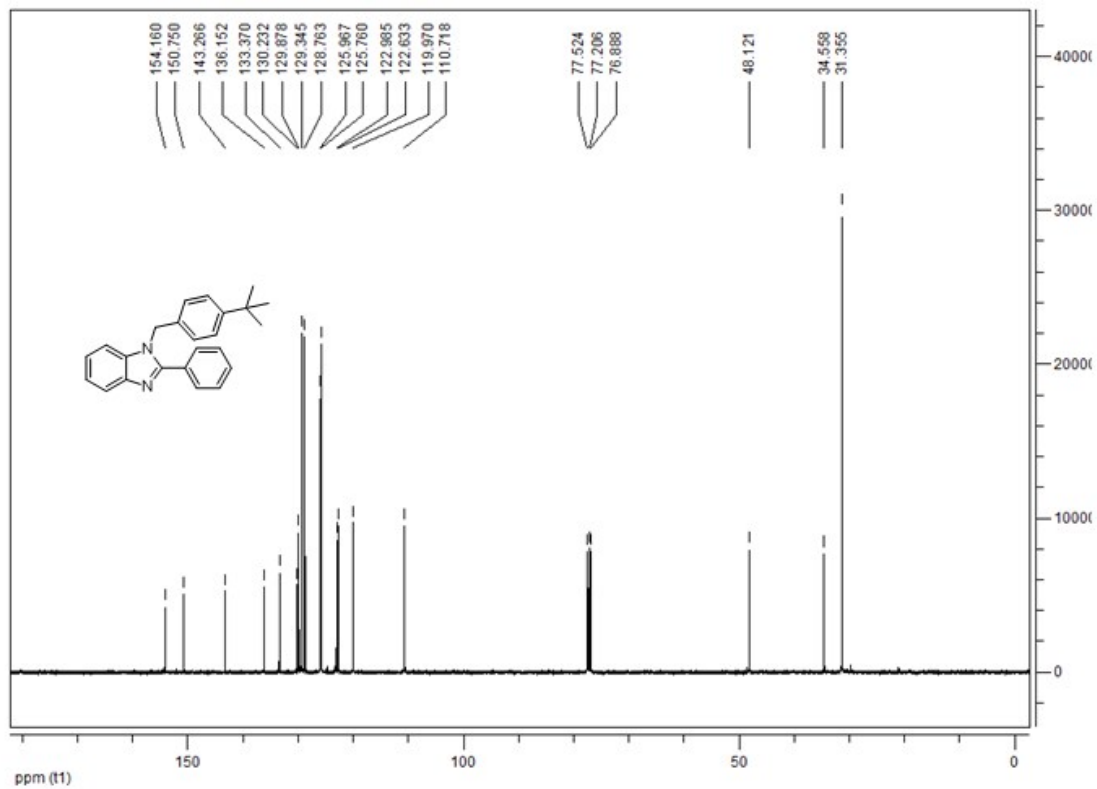

**1-(3-Fluorobenzyl)-2-phenyl-1H-benzo[d]imidazole (3m)**

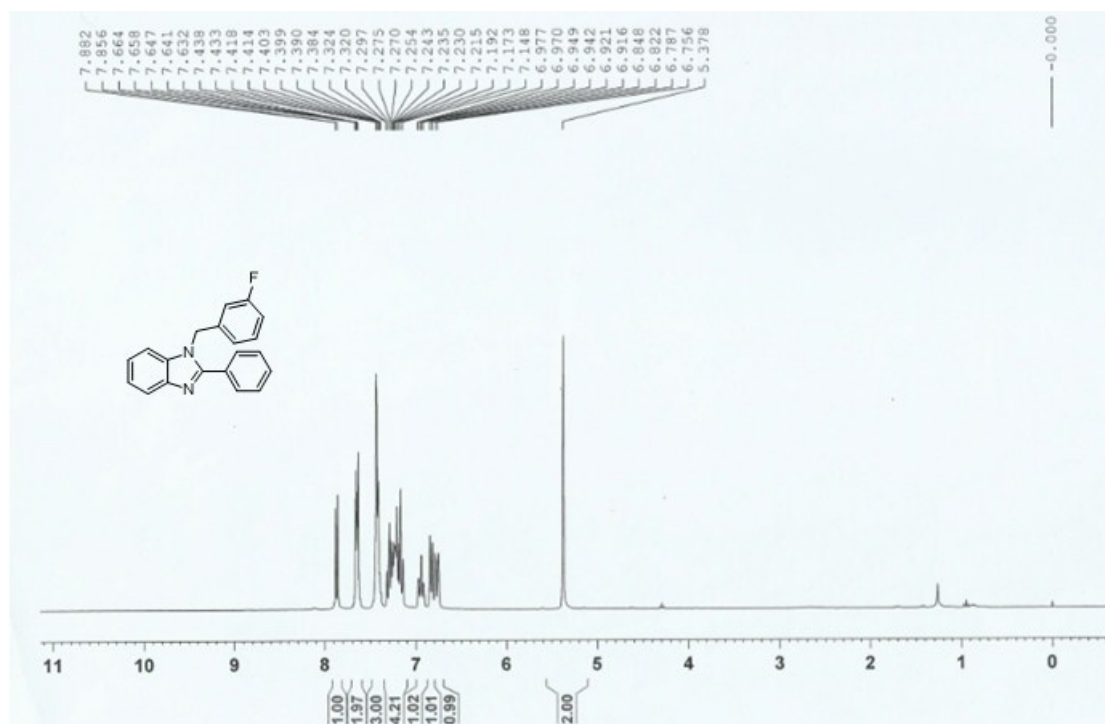

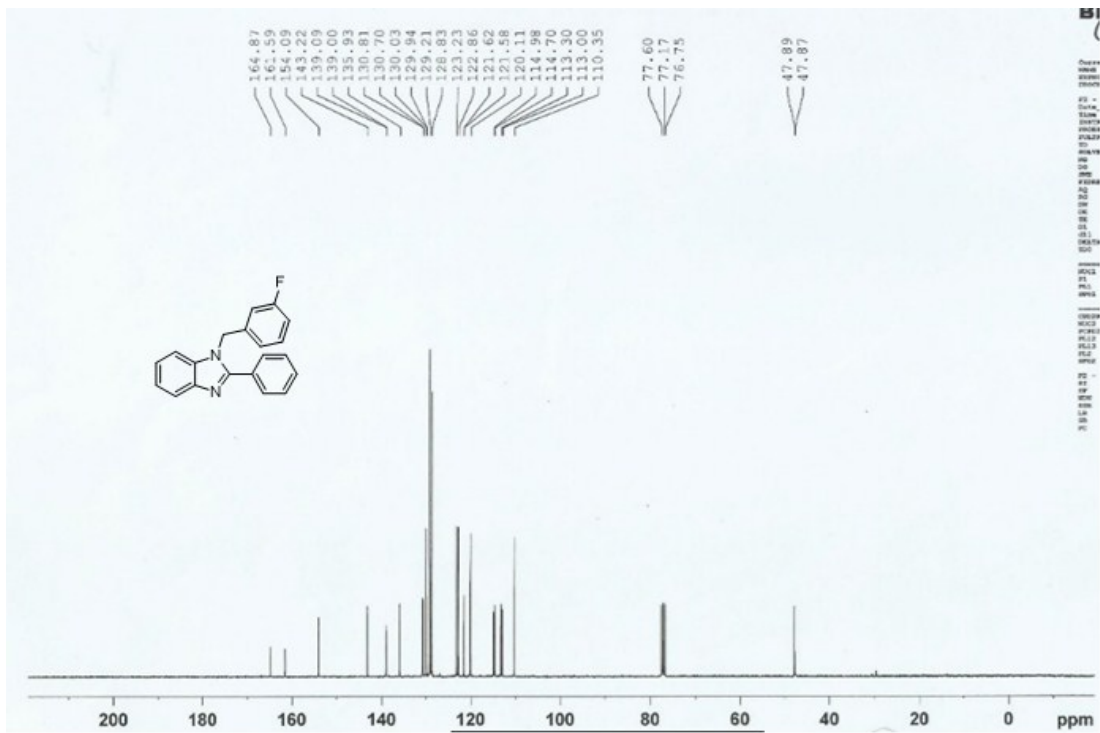

1-(2-Fluorobenzyl)-2-phenyl-1H-benzo[d]imidazole (3n)

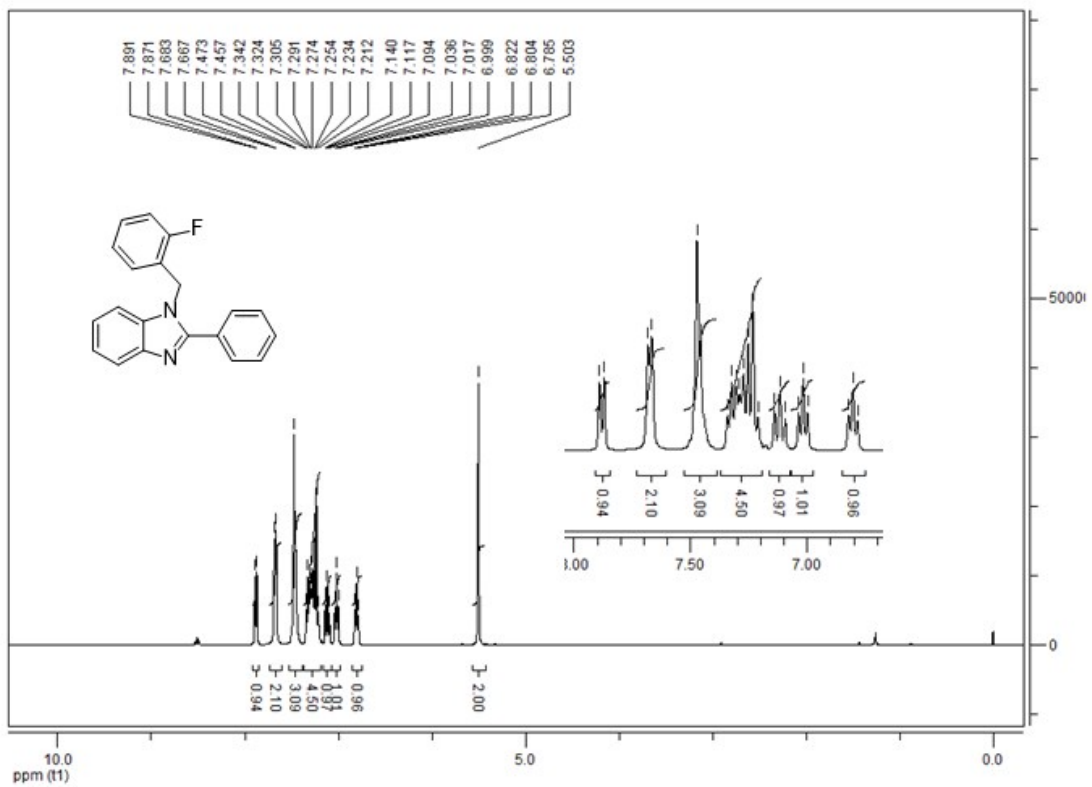

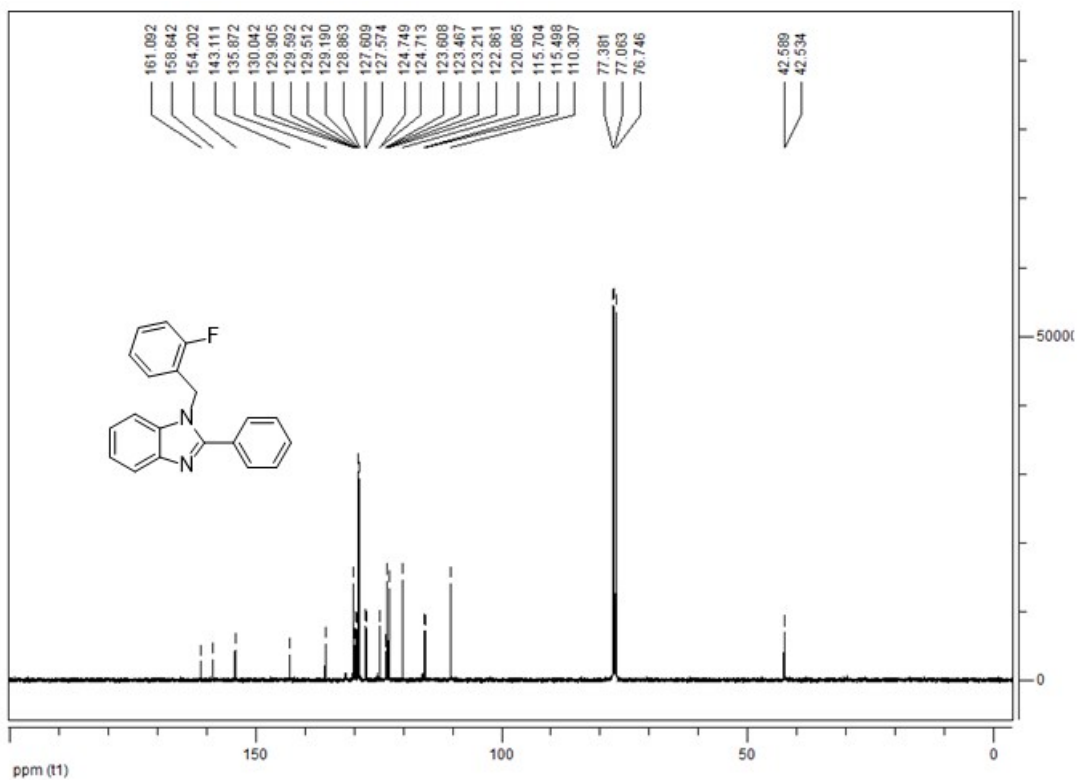

1-(3-Chlorobenzyl)-2-phenyl-1H-benzo[d]imidazole (3o)

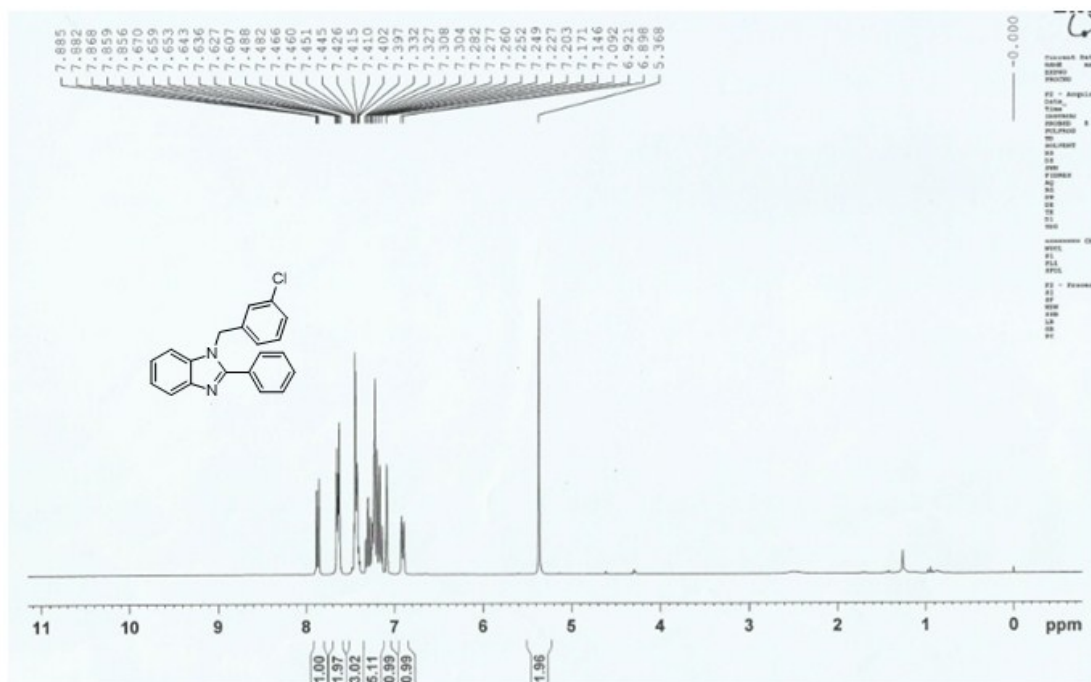



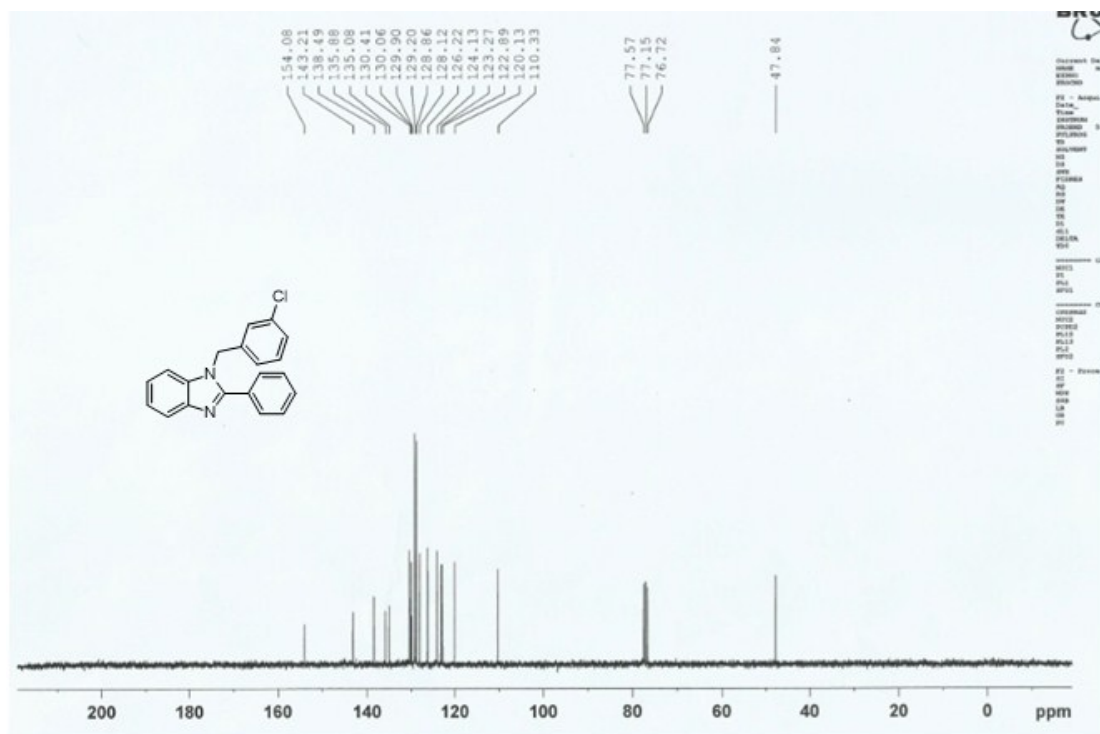

1-(4-Bromobenzyl)-2-phenyl-1H-benzo[d]imidazole (3p)

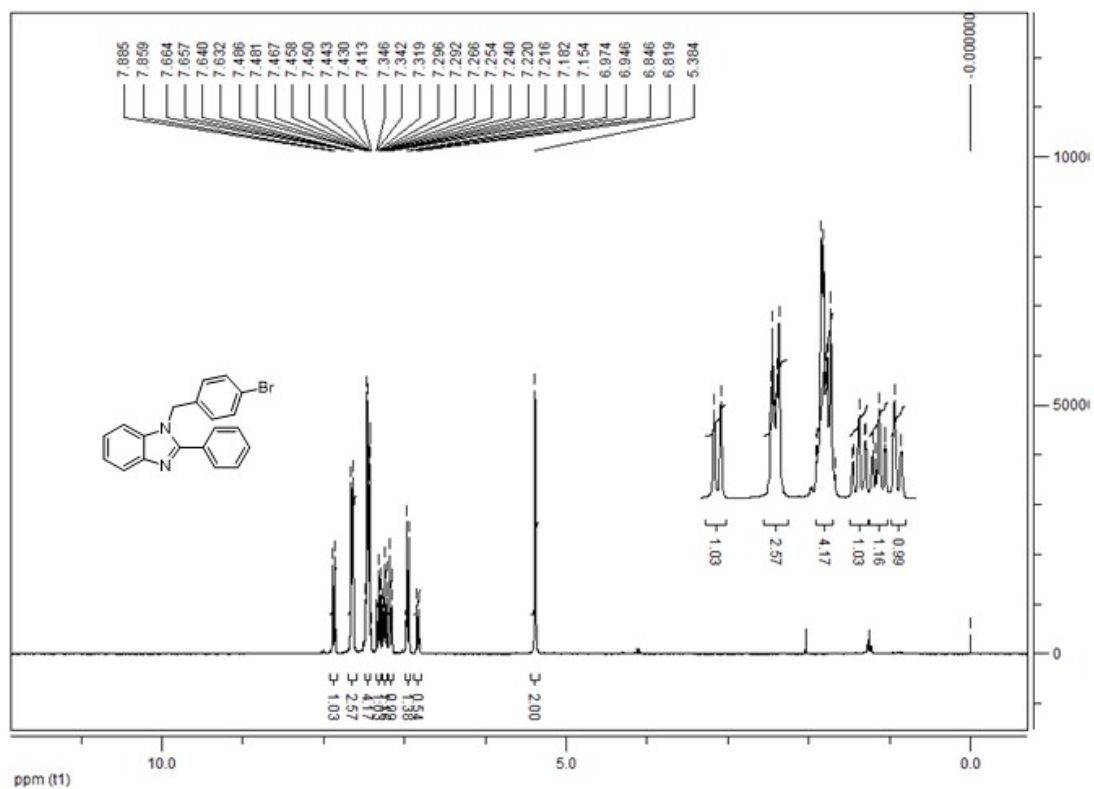

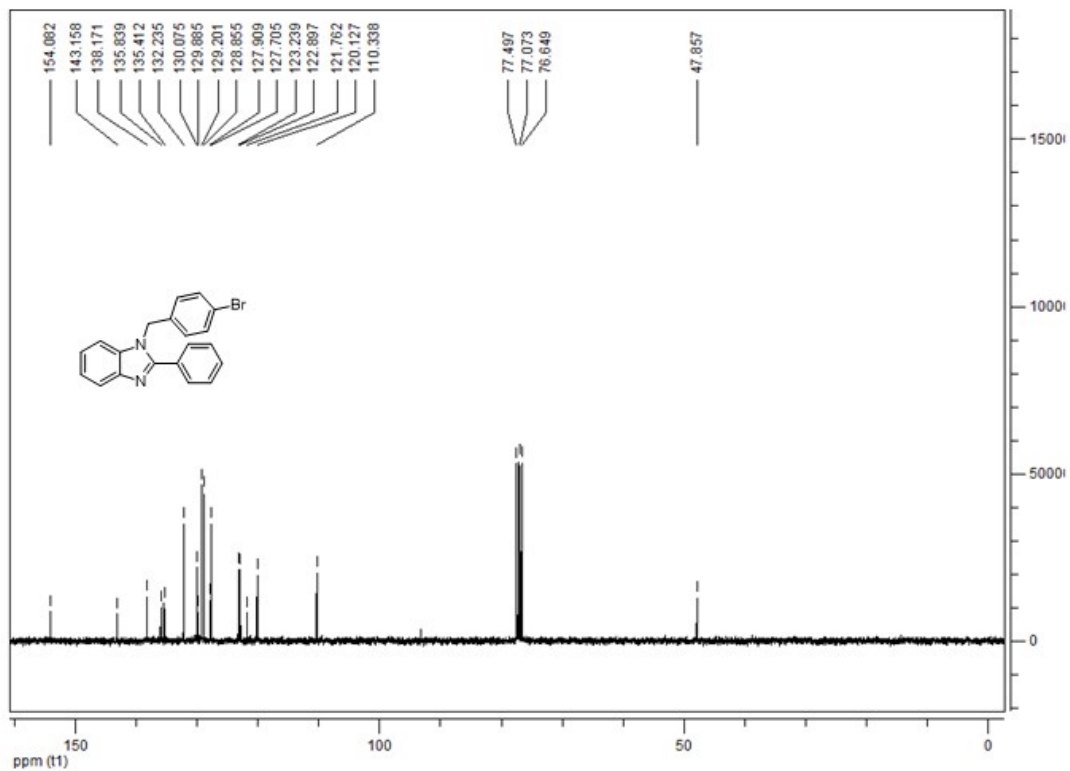

1-(Naphthalen-2-ylmethyl)-2-phenyl-1H-benzo[d]imidazole (3q)

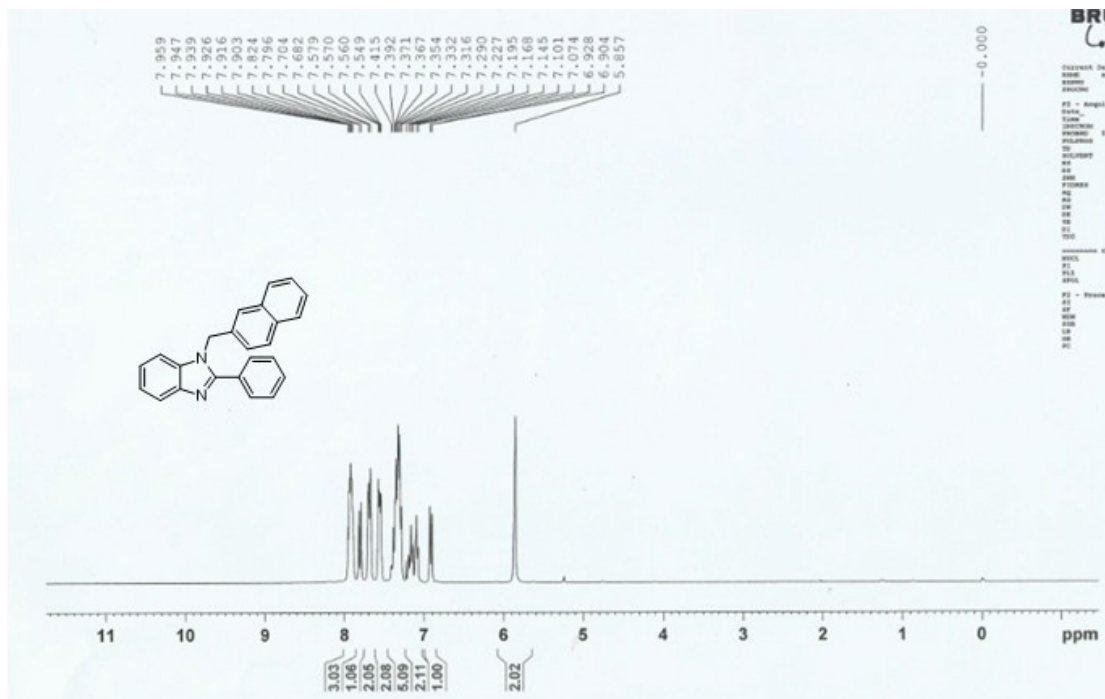

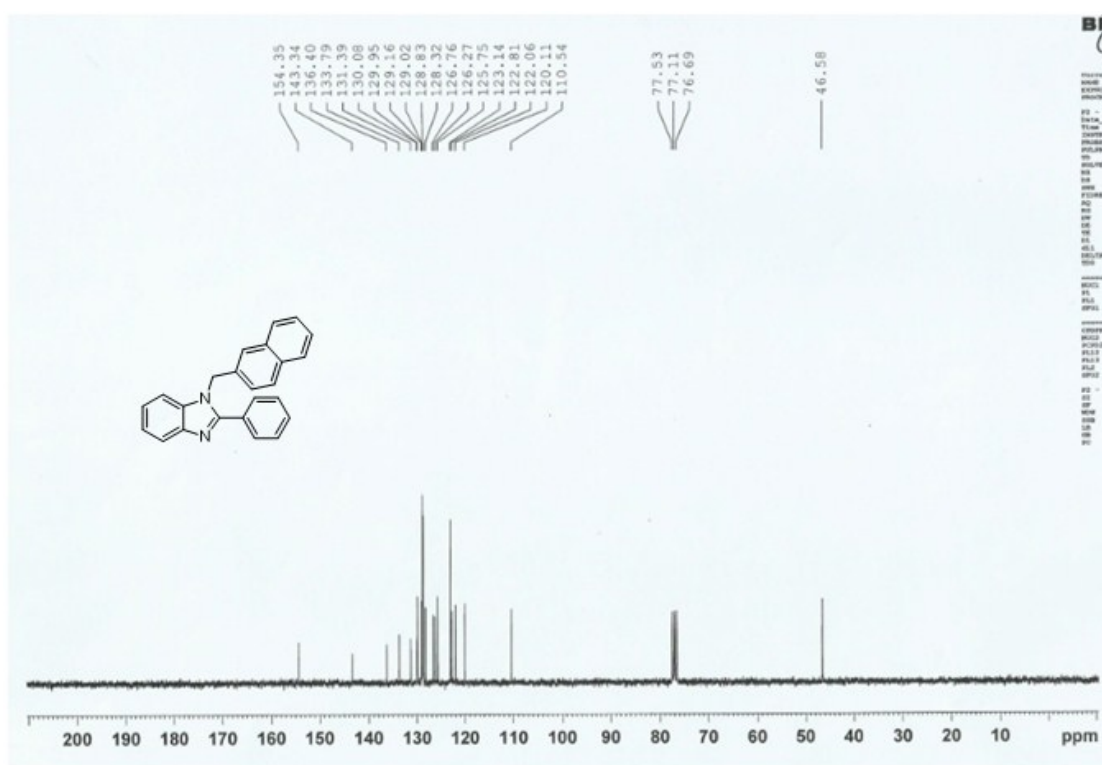

**1-((1,1'-Biphenyl)-4-ylmethyl)-2-phenyl-1H-benzo[d]imidazole (3r)**

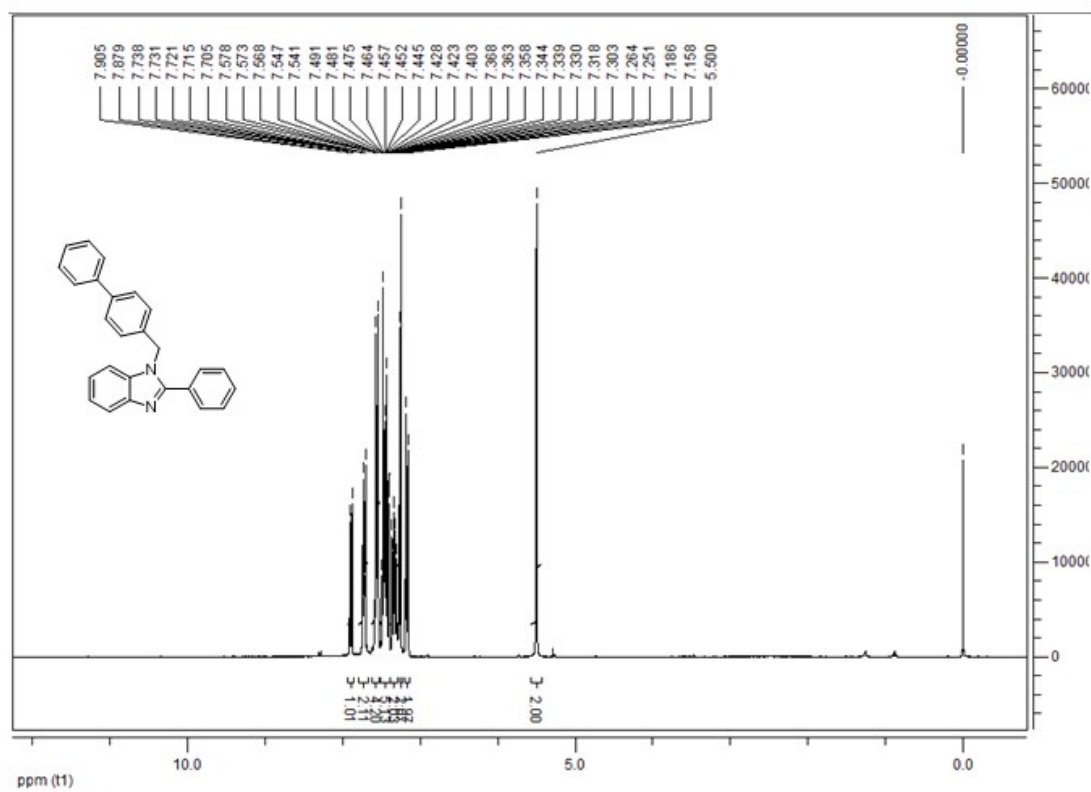

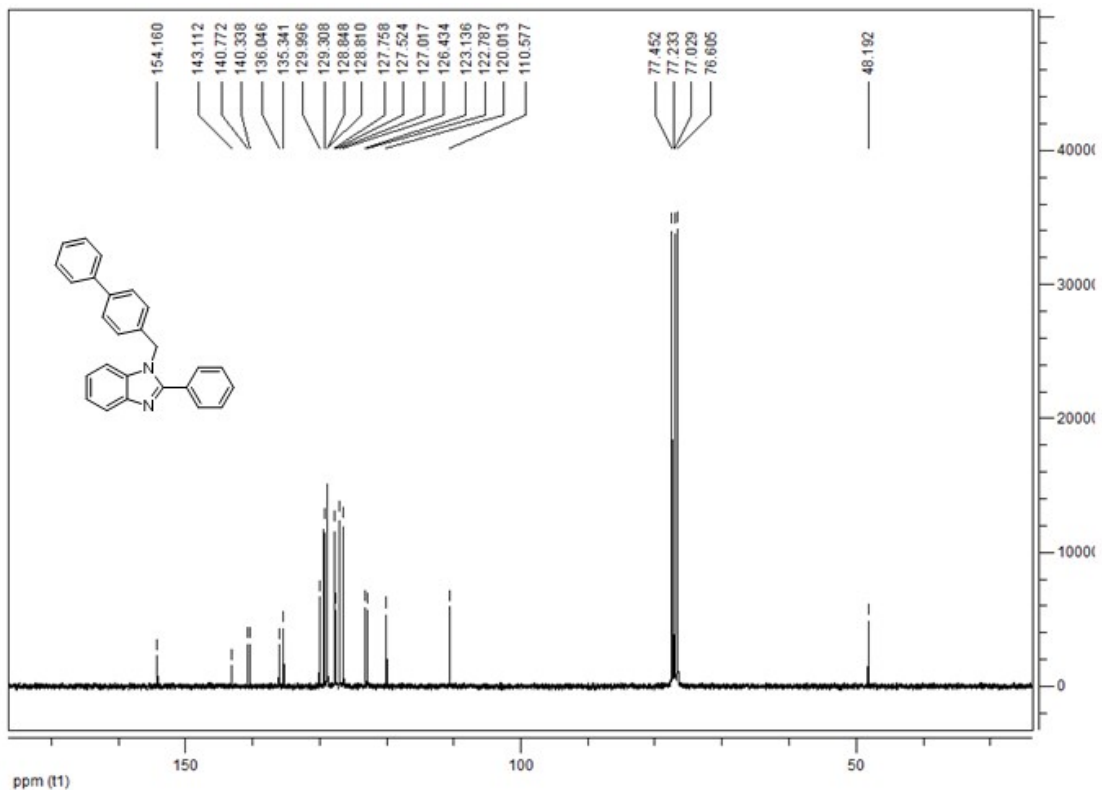

1-Hexyl-2-phenyl-1H-benzo[d]imidazole (3s)

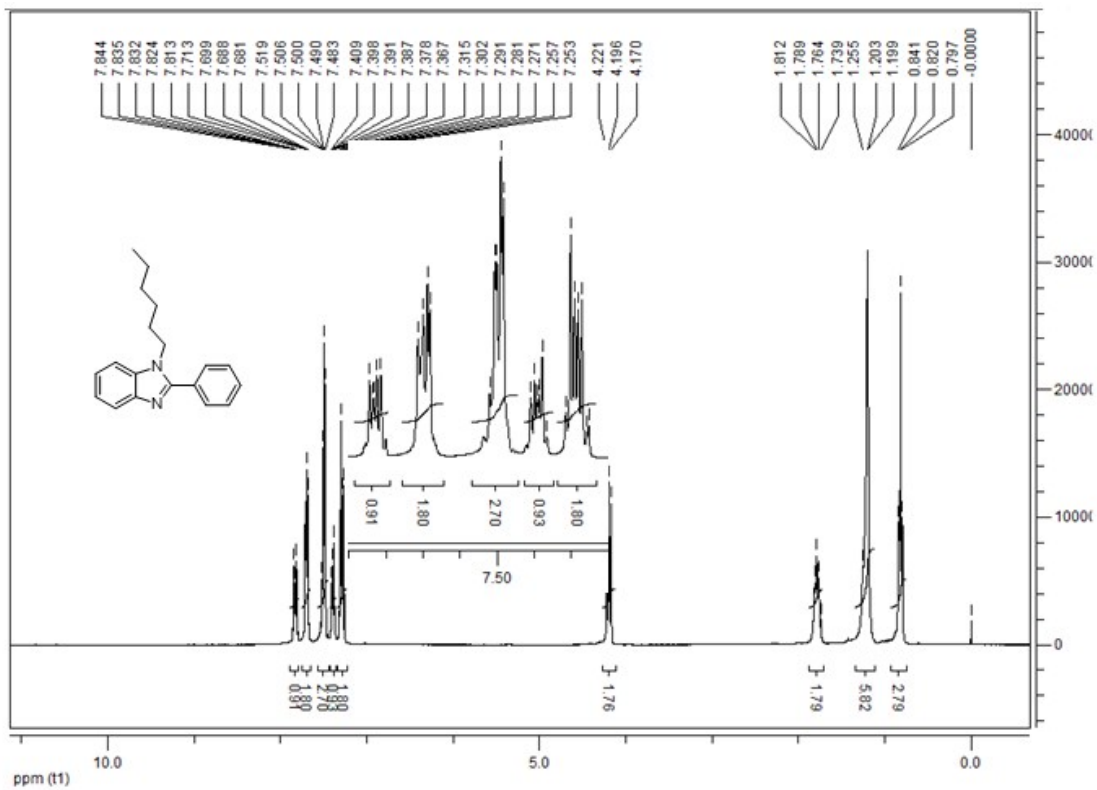

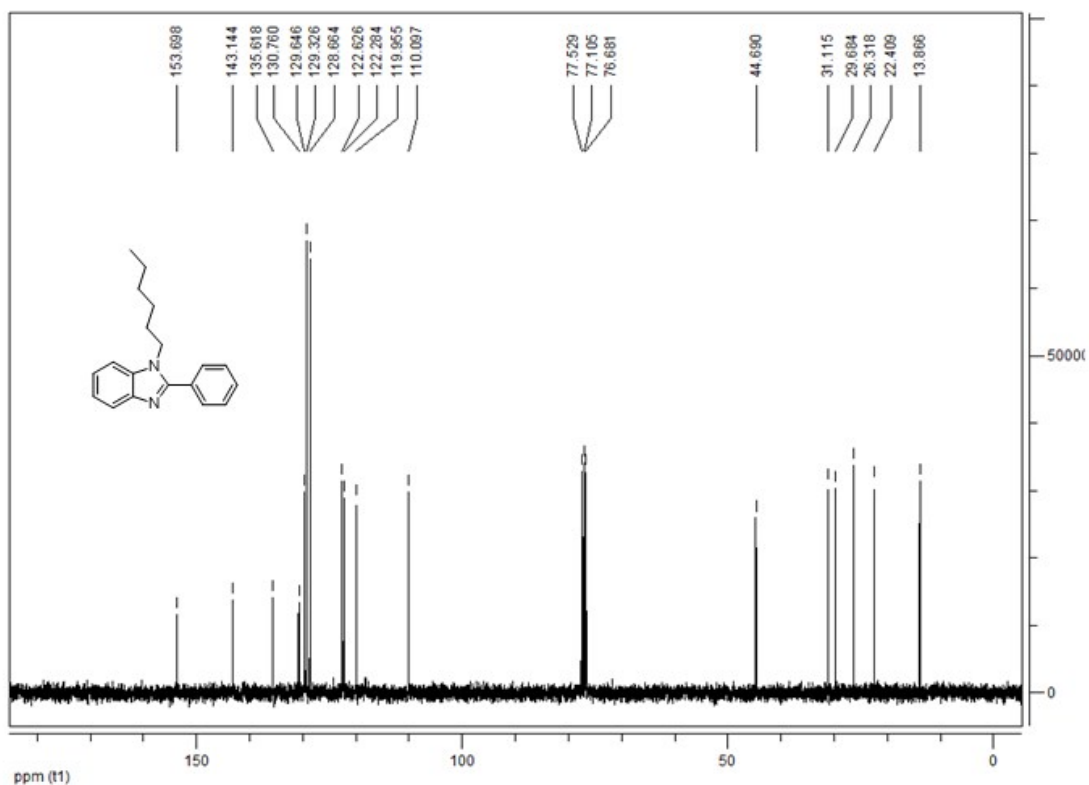

**1-(3-Methylbut-2-en-1-yl)-2-phenyl-1H-benzo[d]imidazole (3t)**

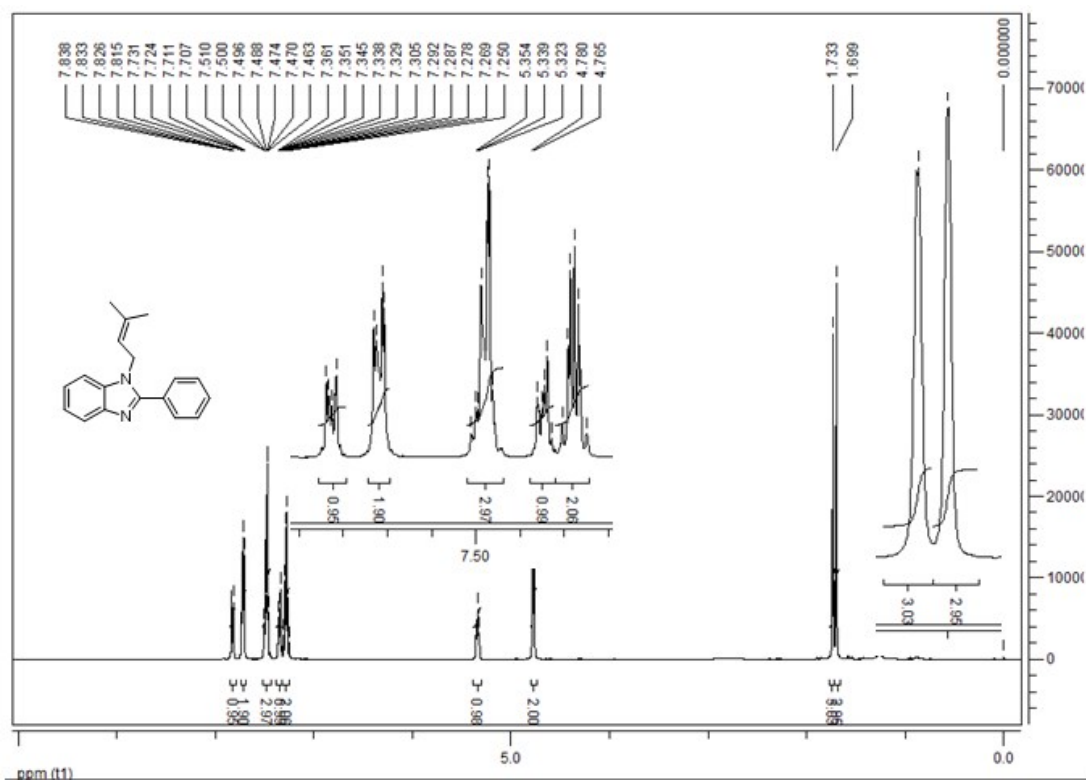

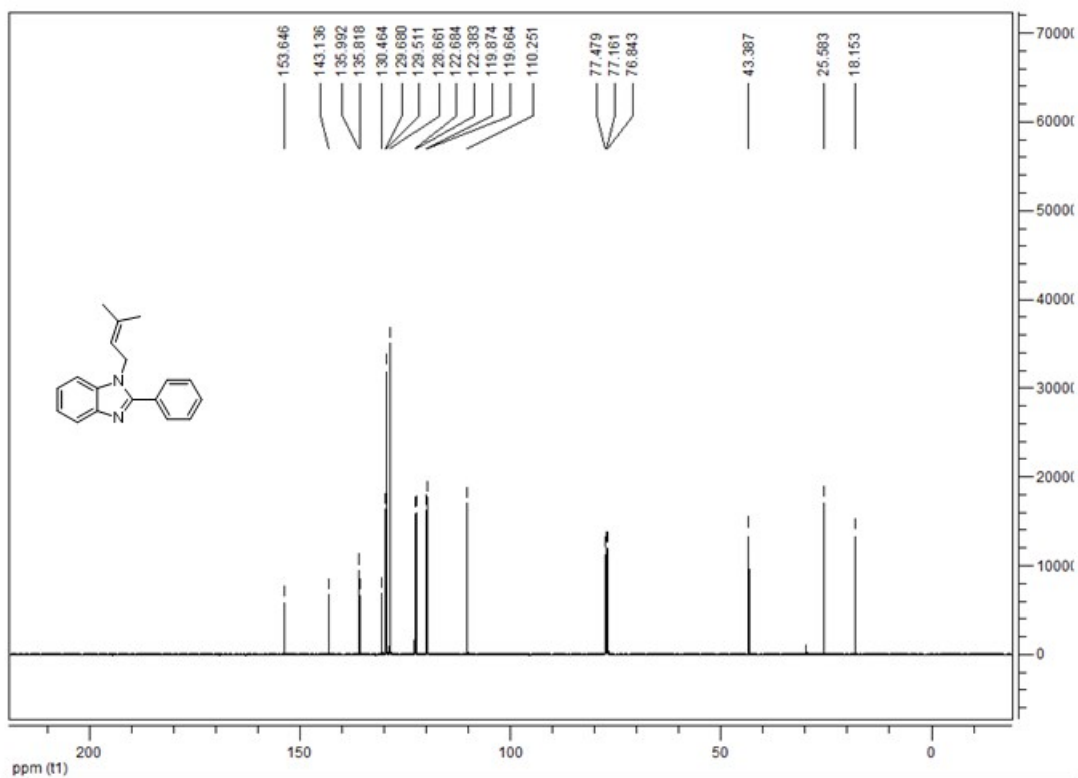

5-Chloro-1-(3-chlorobenzyl)-2-phenyl-1H-benzo[d]imidazole (3u)

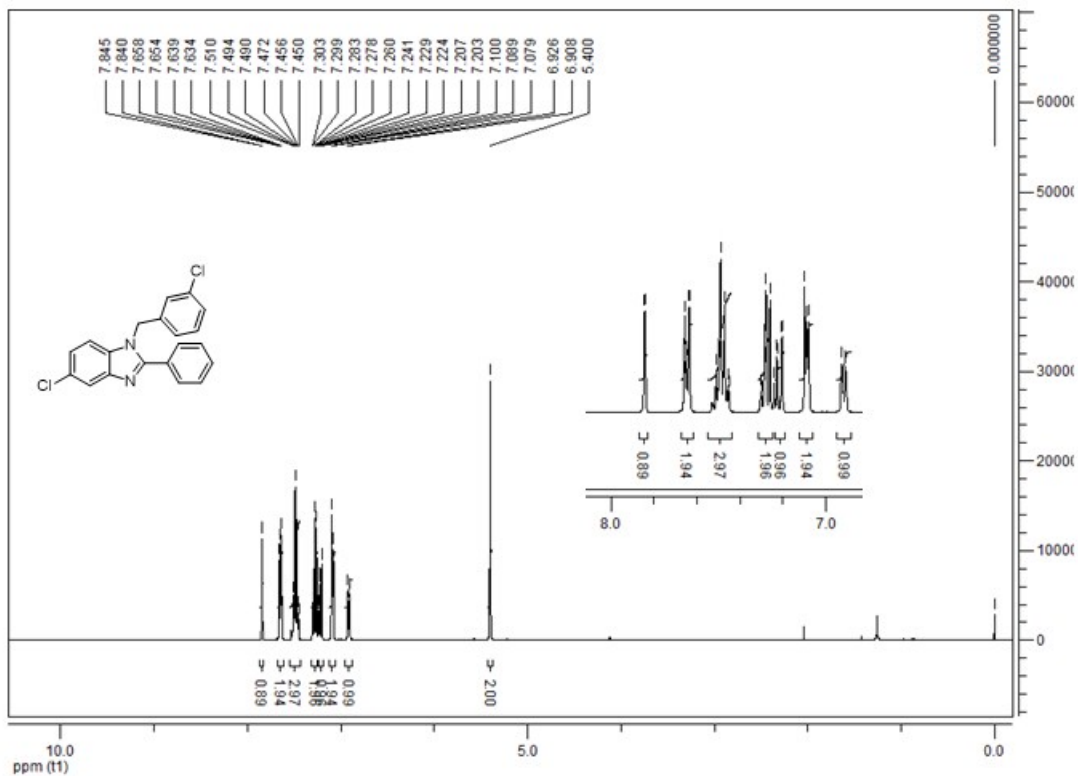

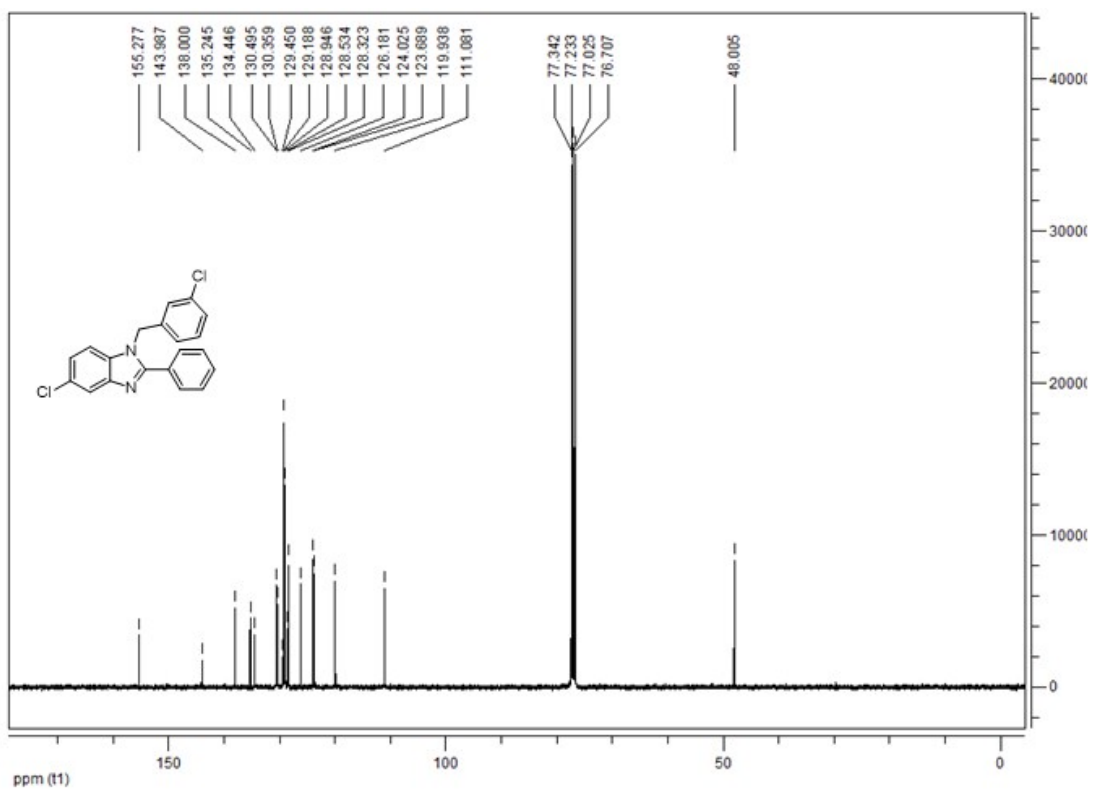

1-Benzyl-2-(*p*-tolyl)-1*H*-benzo[*d*]imidazole(3v)

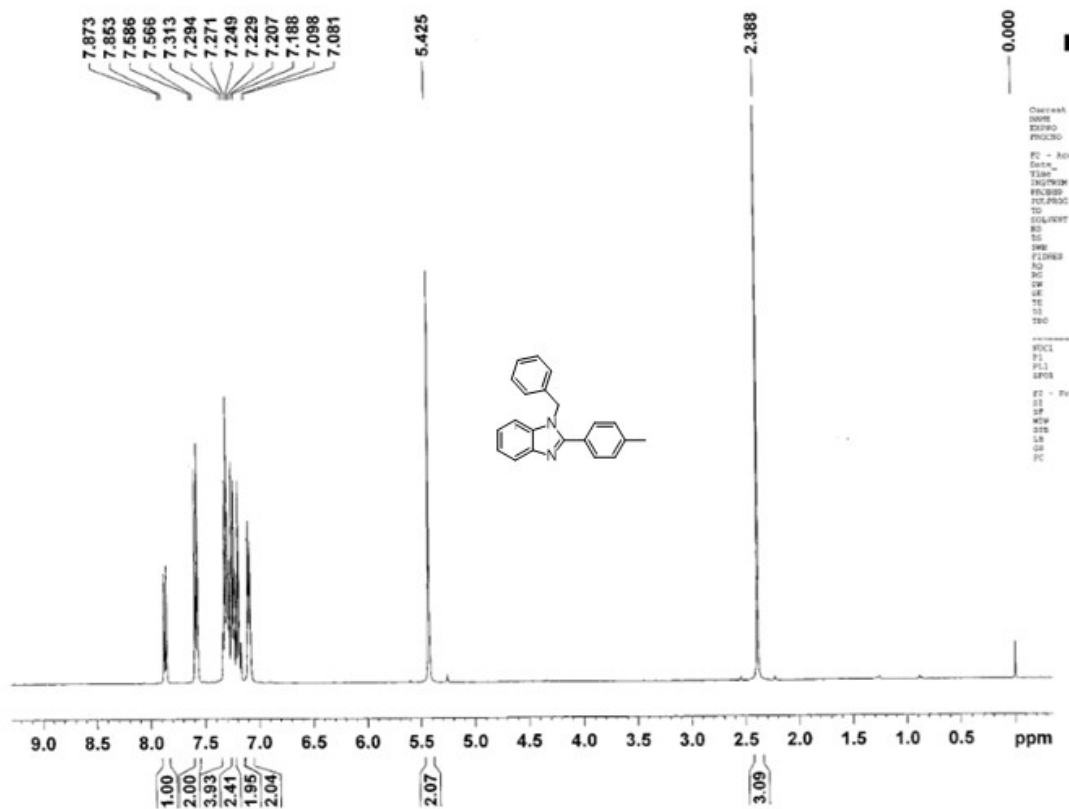

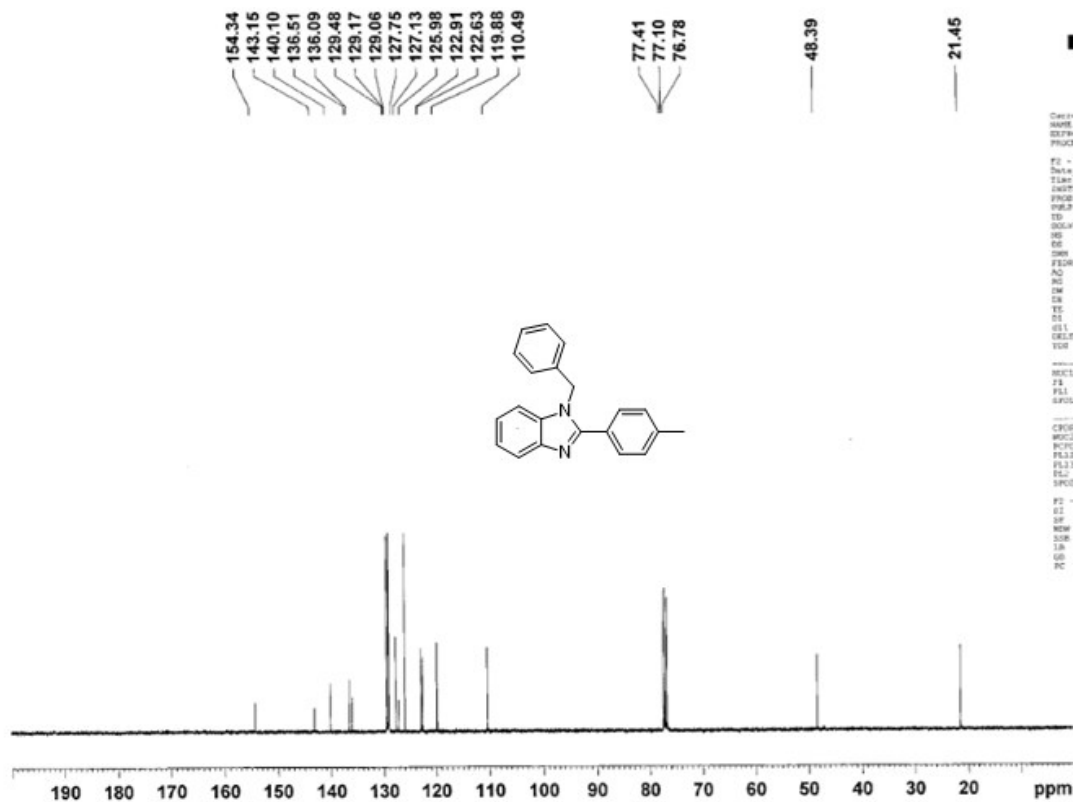

1-Benzyl-2-(4-methoxyphenyl)-1H-benzo[d]imidazole (3w)

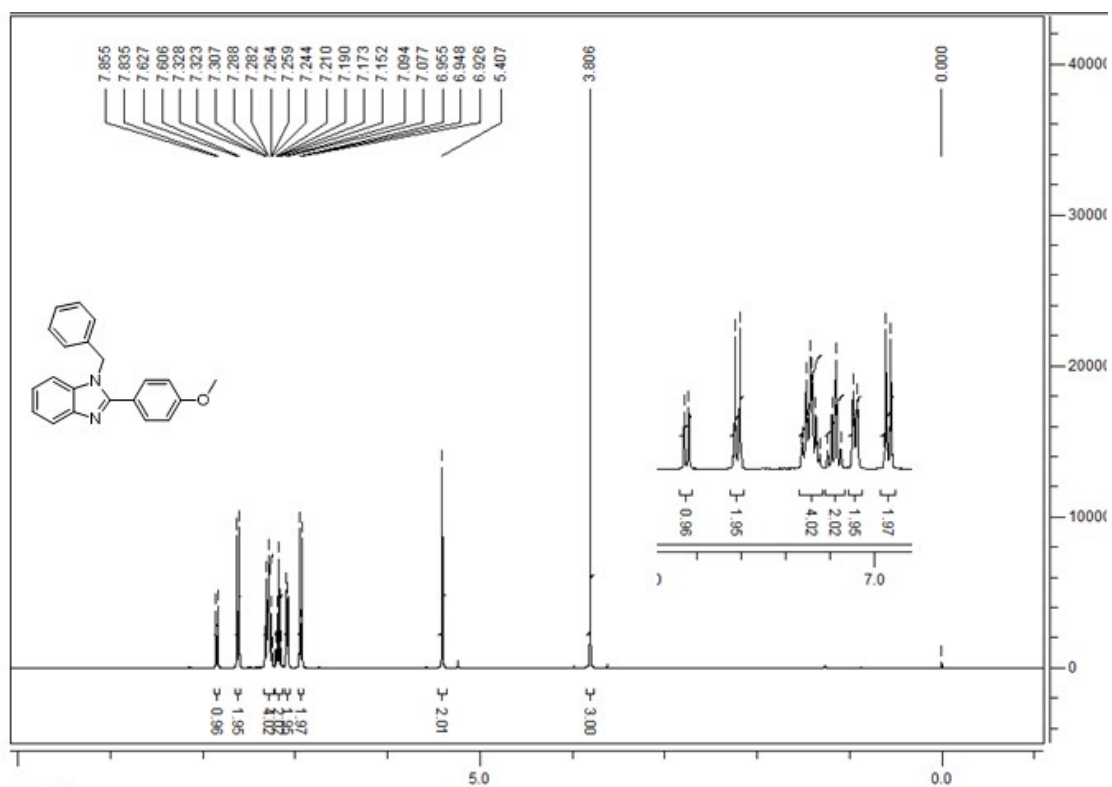



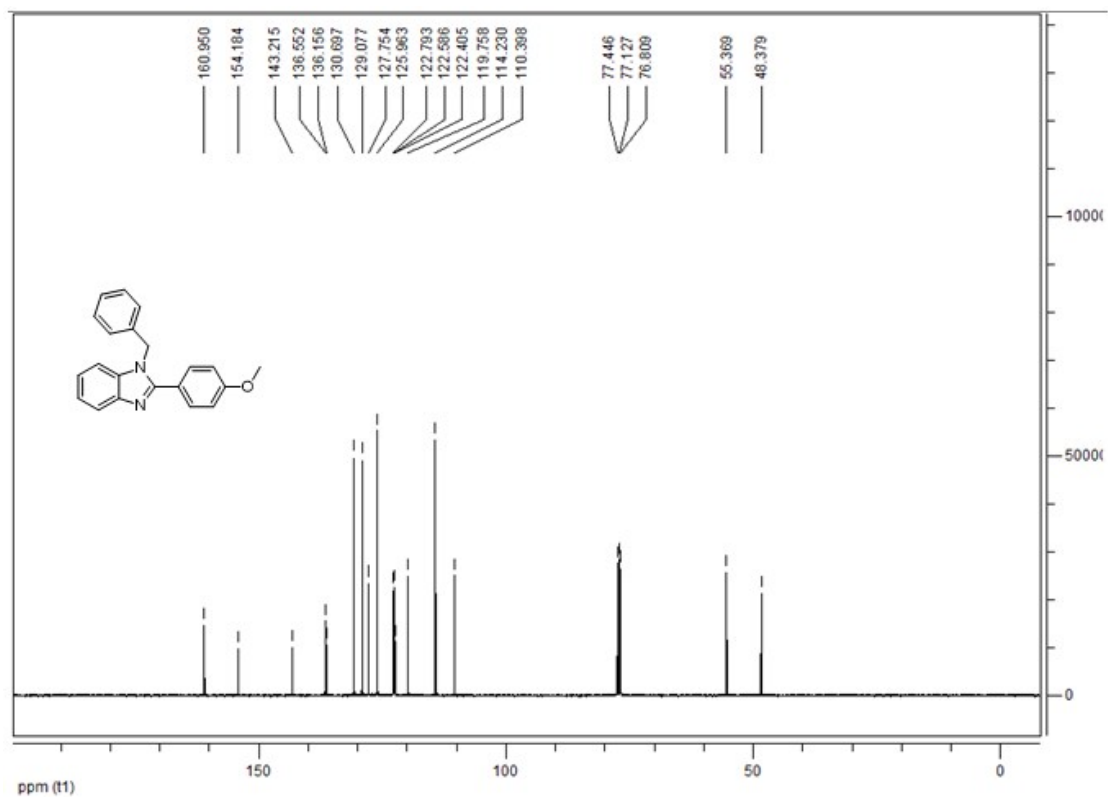

**1-Benzyl-2-(4-chlorophenyl)-1H-benzimidazole (3x)**

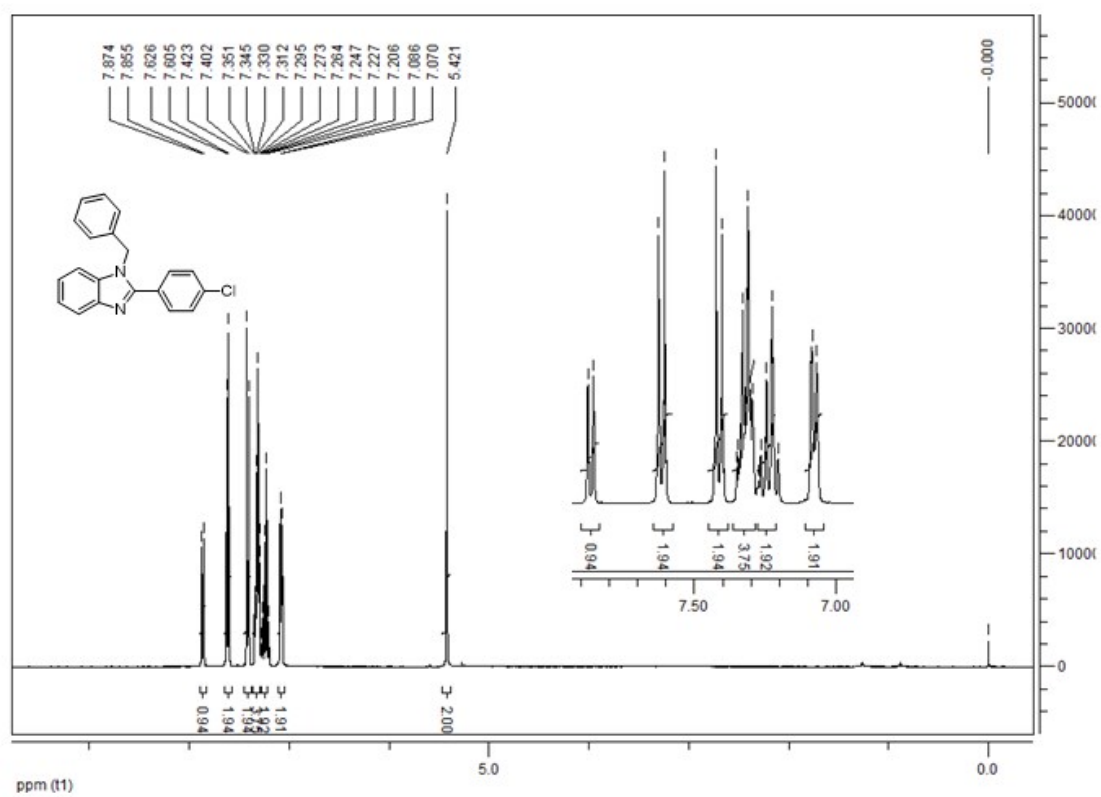

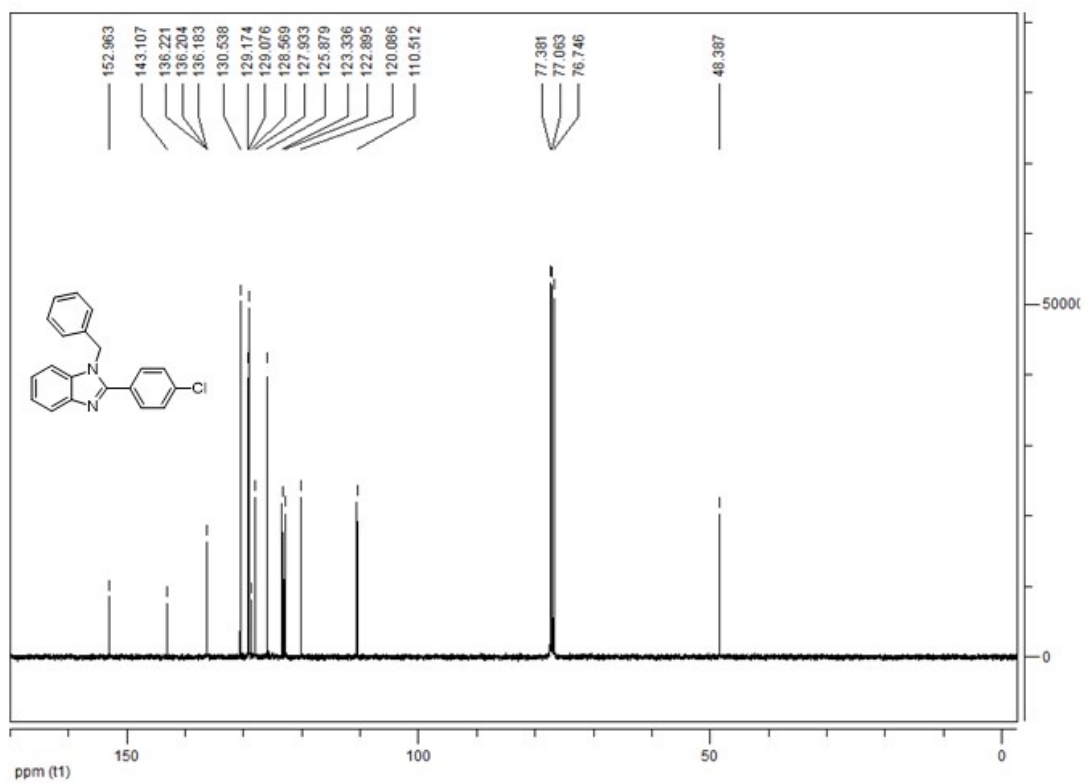

**1-Benzyl-2-(4-fluorophenyl)-1H-benzodimidazole (3y)**

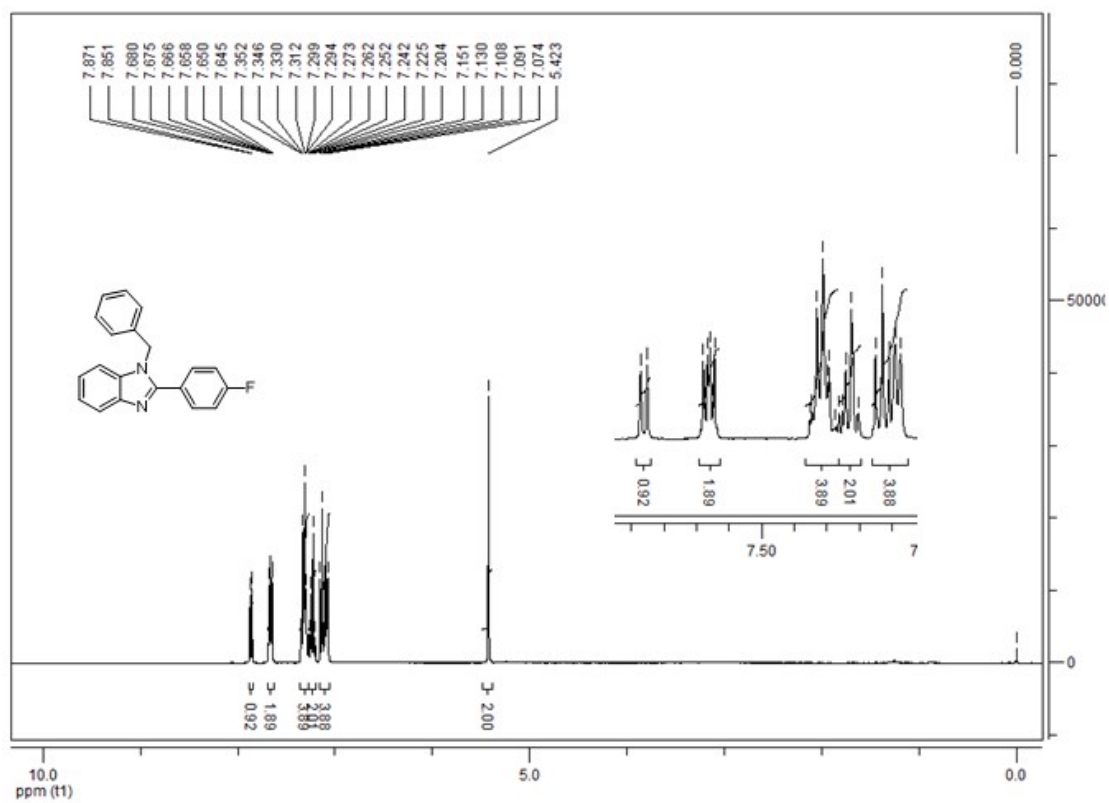

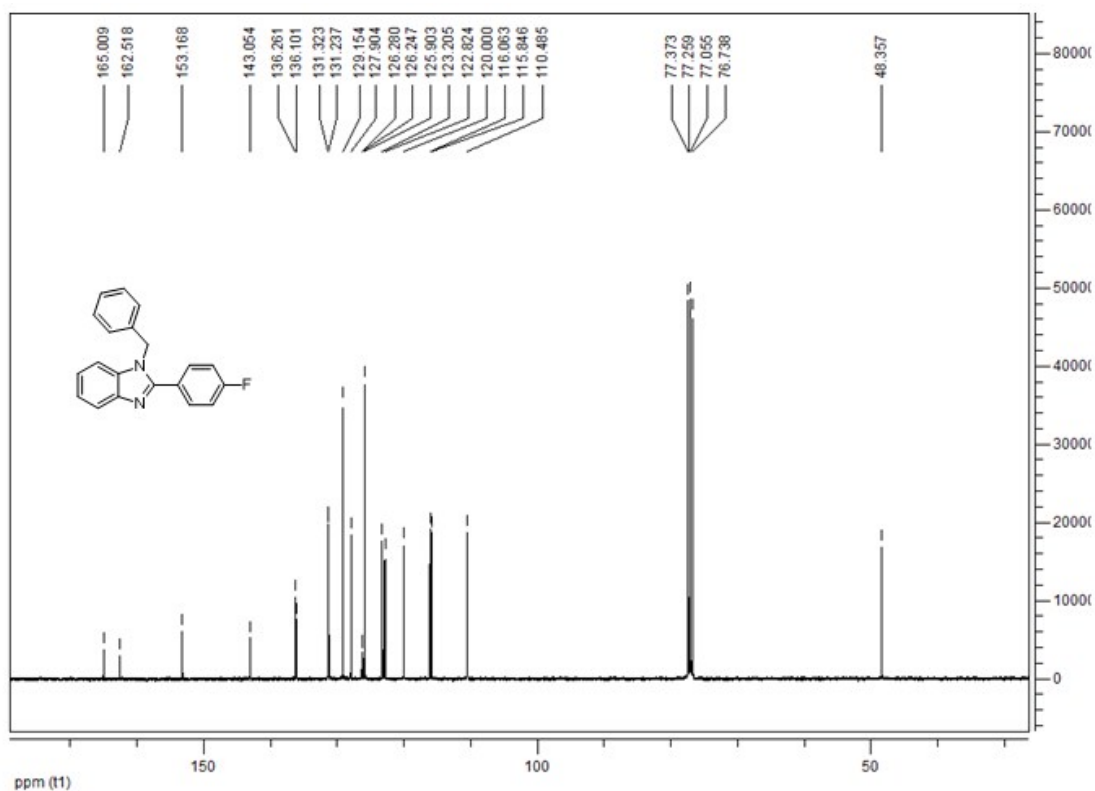

**1-Benzyl-2-(4-(trifluoromethyl)phenyl)-1H-benzo[d]imidazole (3z).**

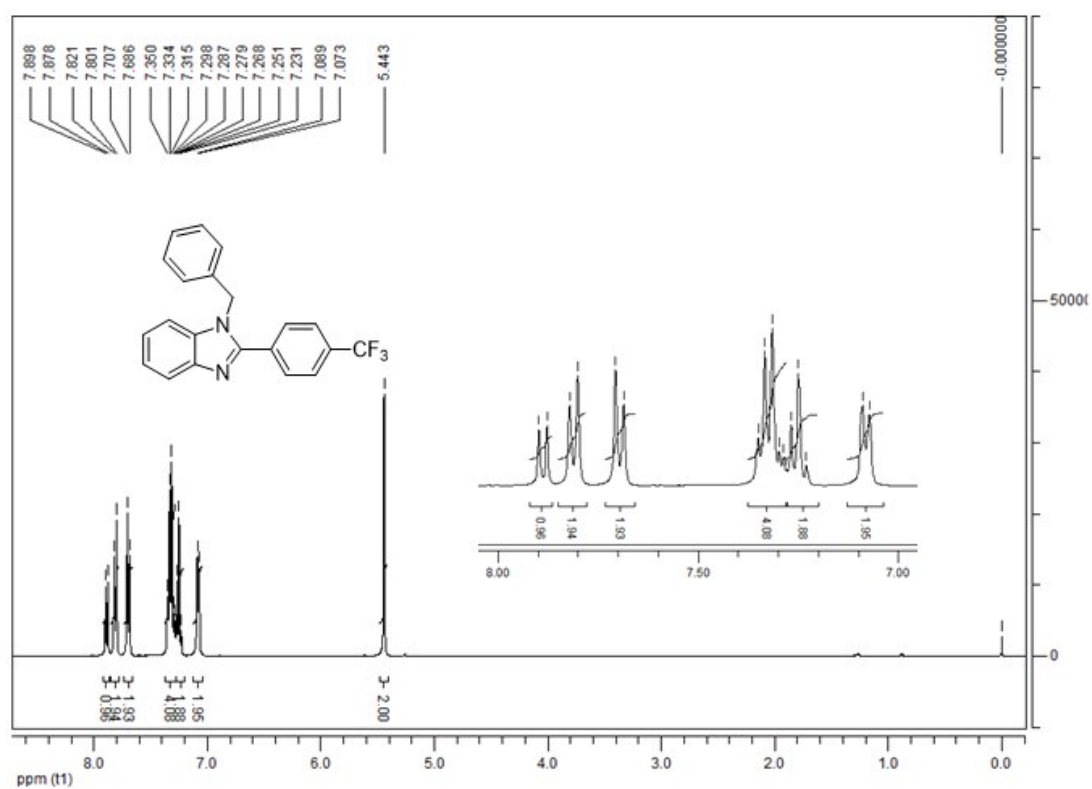

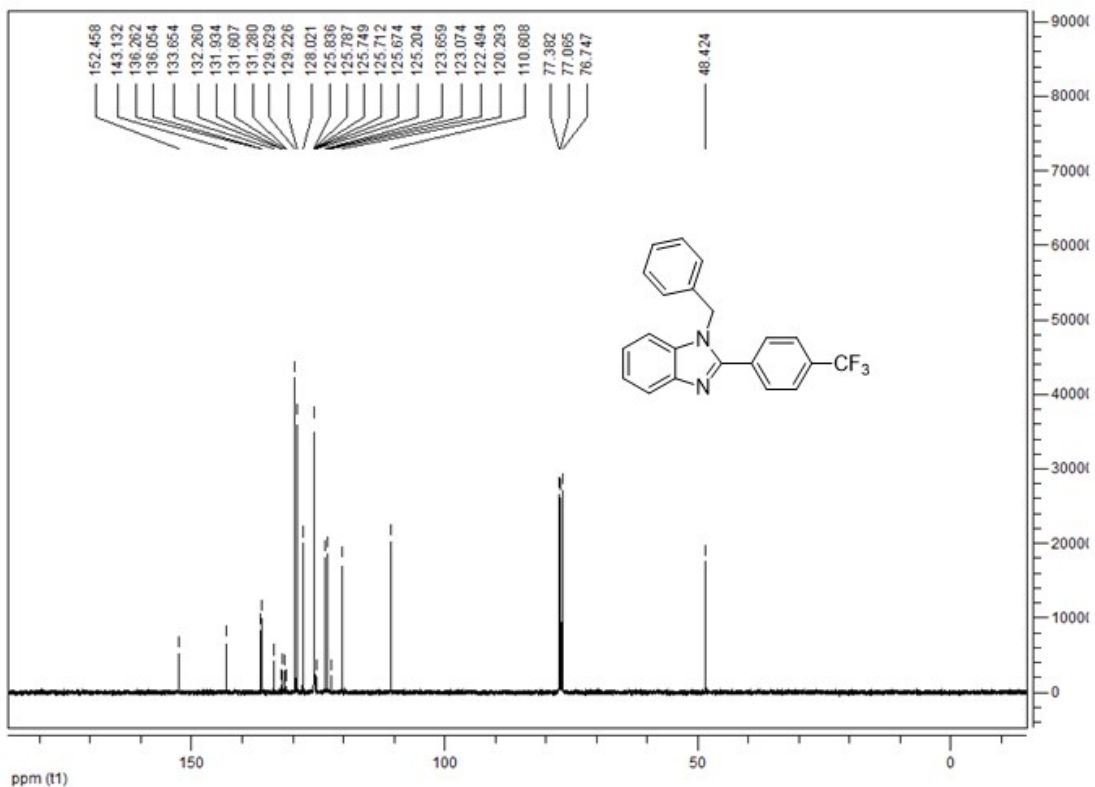

**1-Benzyl-2-(3-chlorophenyl)-1H-benzo[d]imidazole (3aa).**

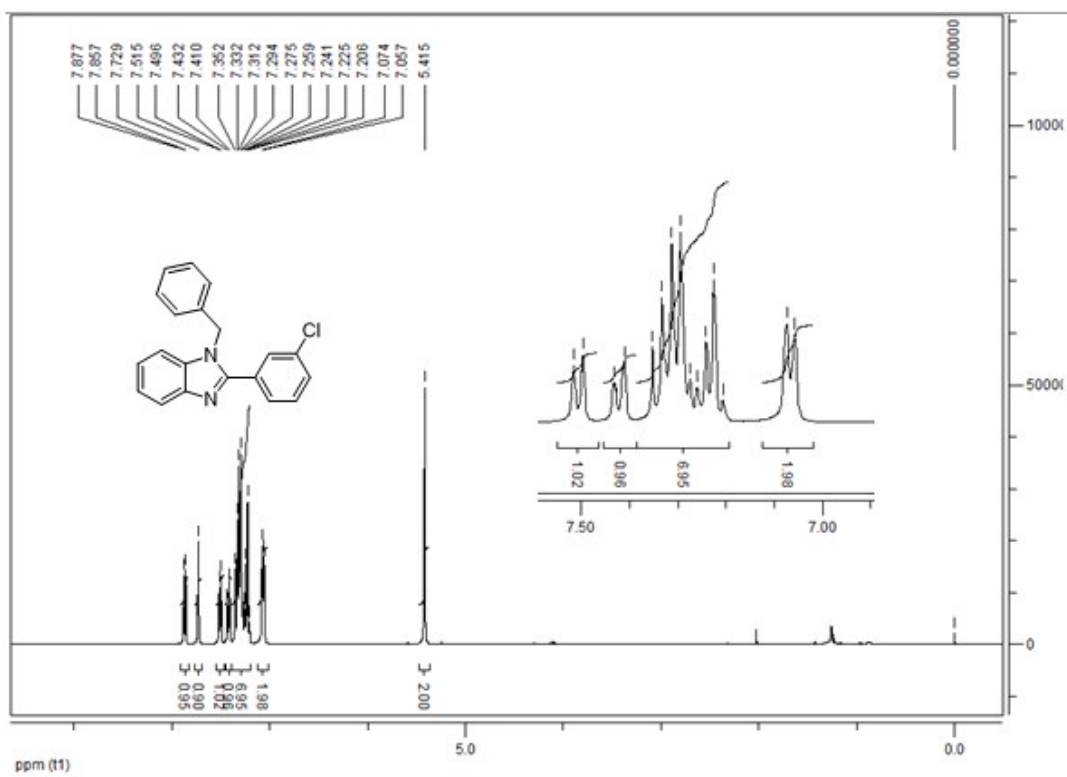

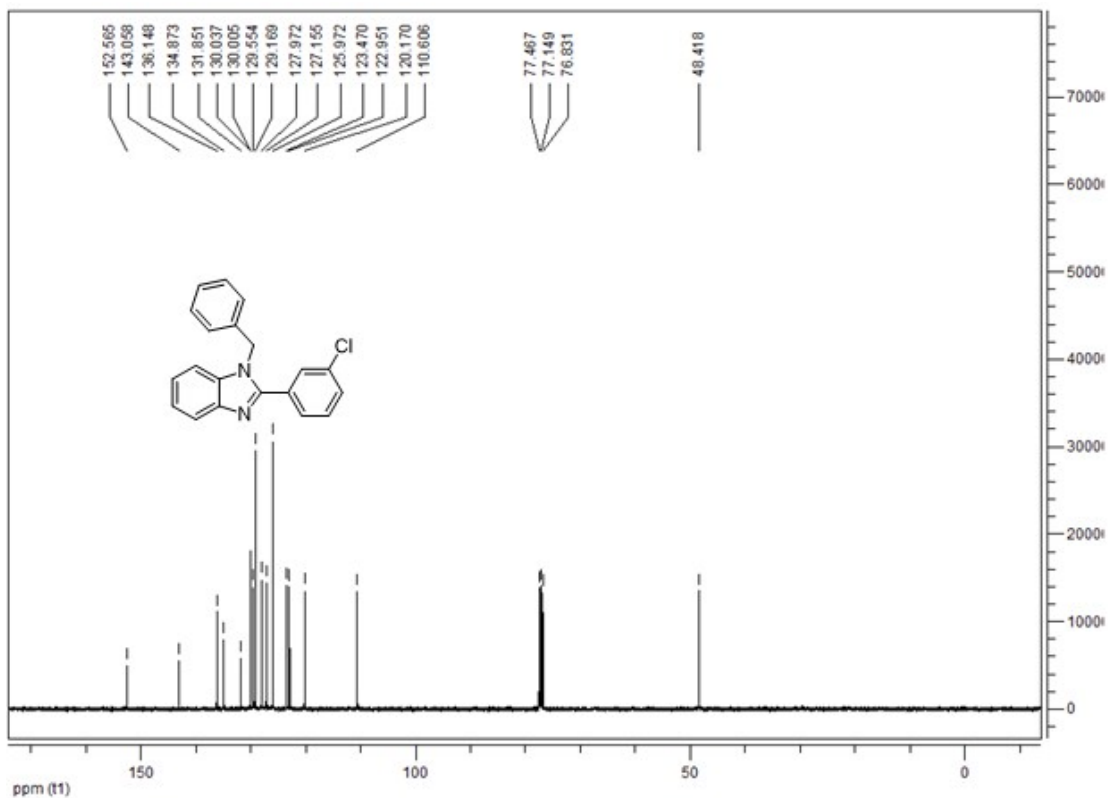

**1-Benzyl-2-(3-fluorophenyl)-1H-benzo[d]imidazole (3ab).**

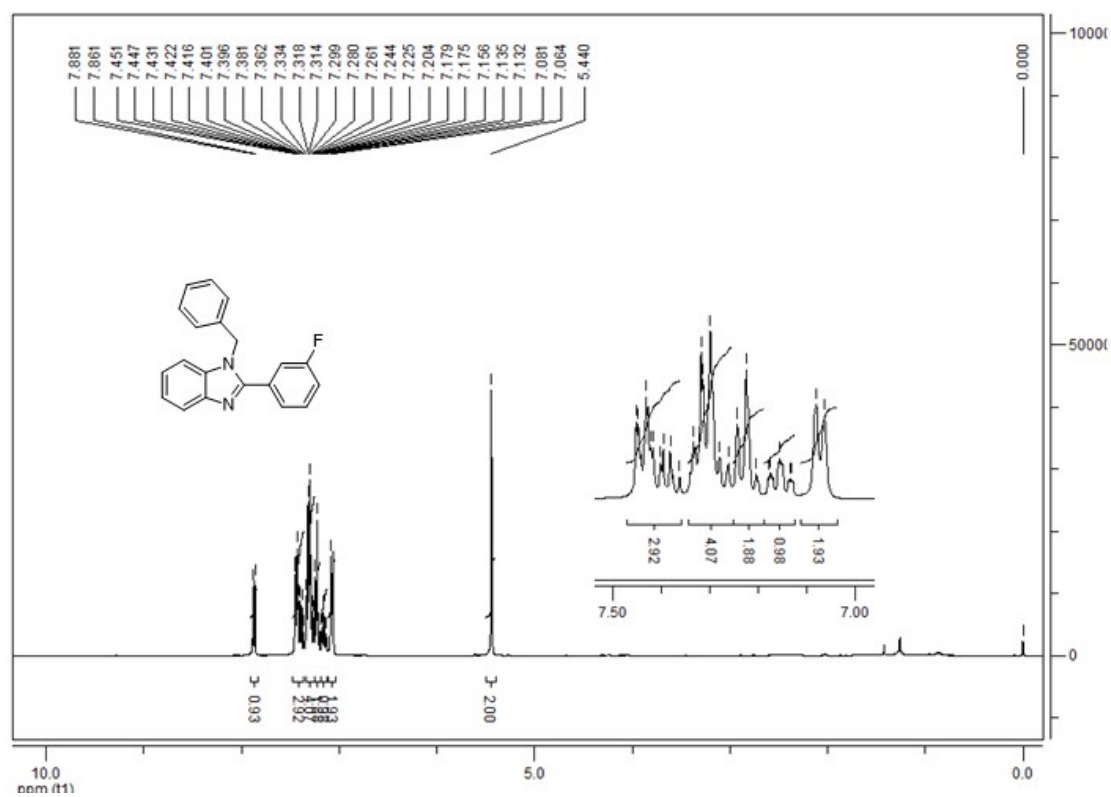

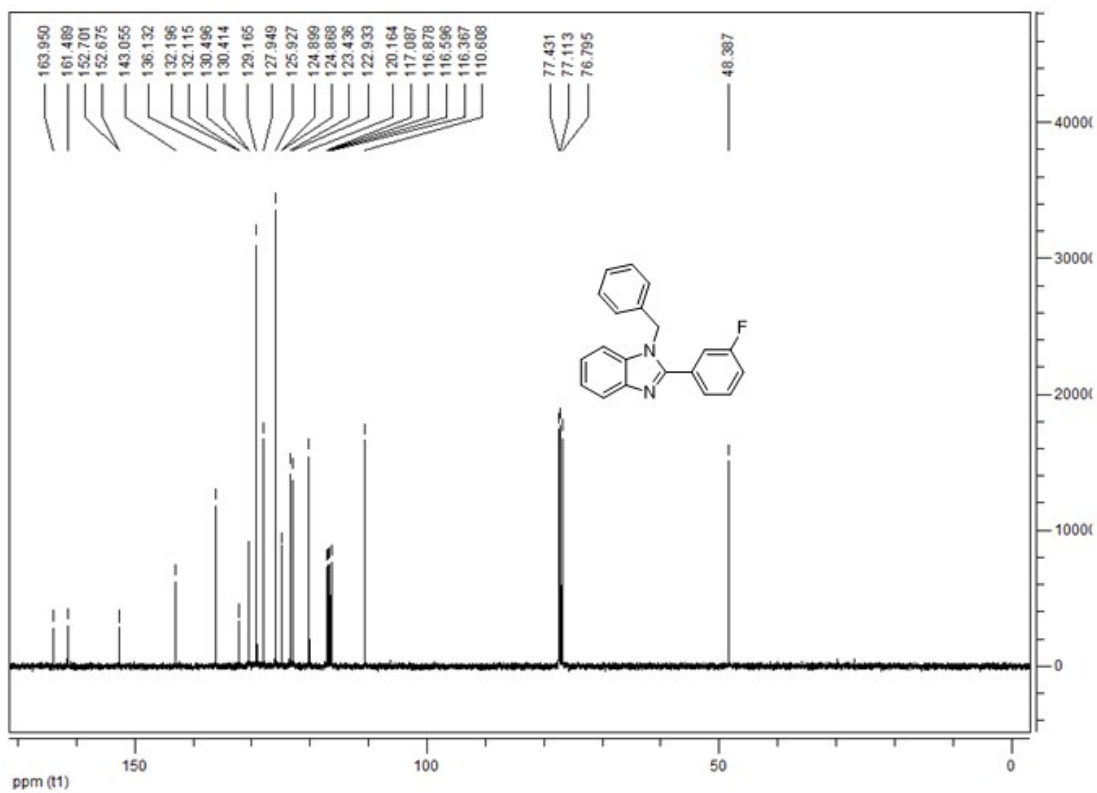

**1-Benzyl-2-(thiophen-2-yl)-1H-benzo[d]imidazole (3ac)**

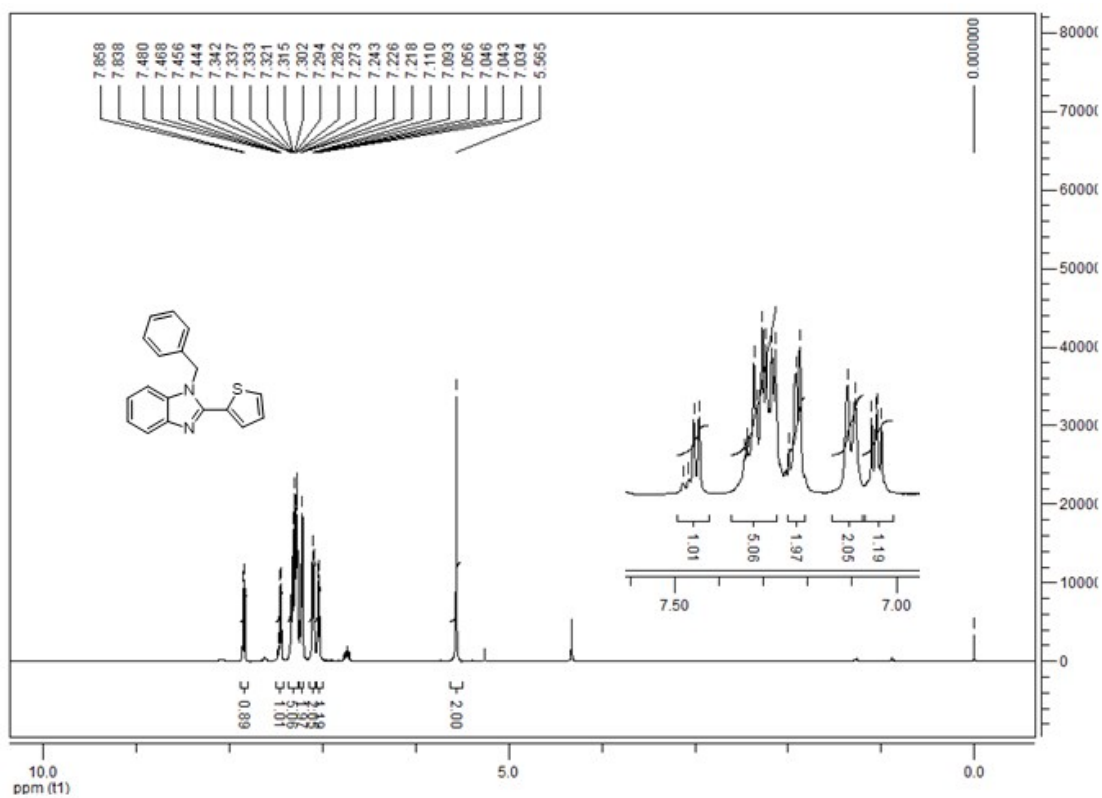

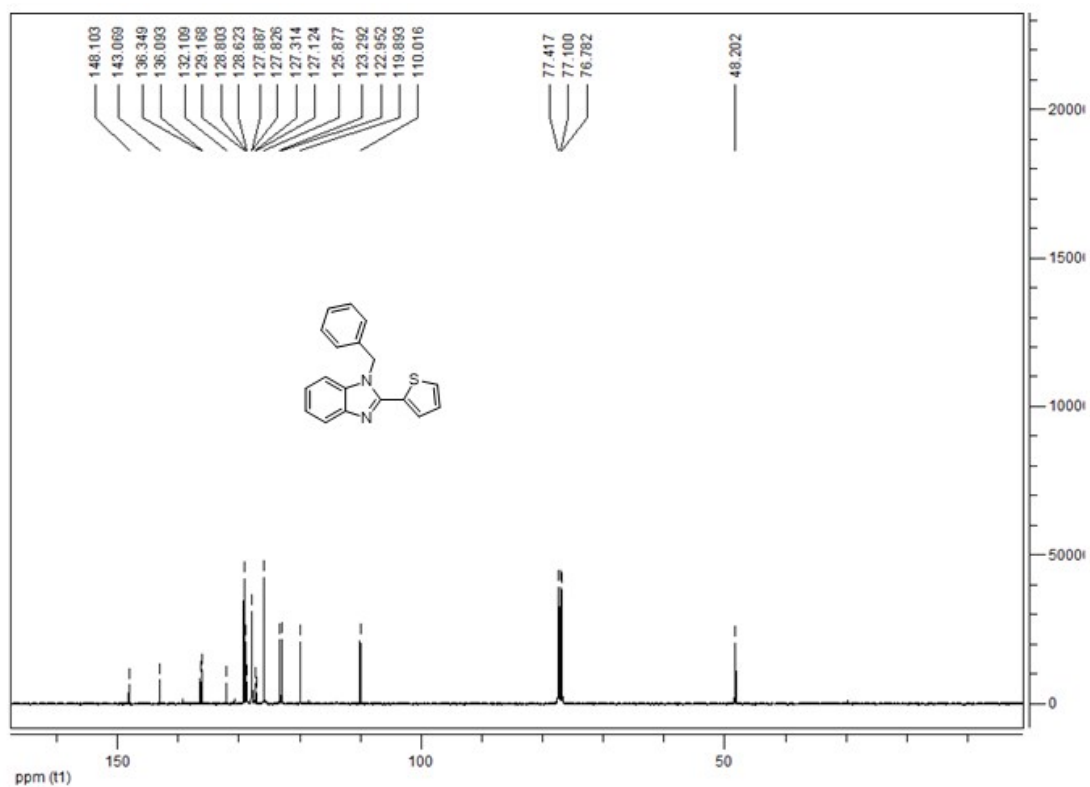

**1-Benzyl-1H-benzo[d]imidazole (3ad)**

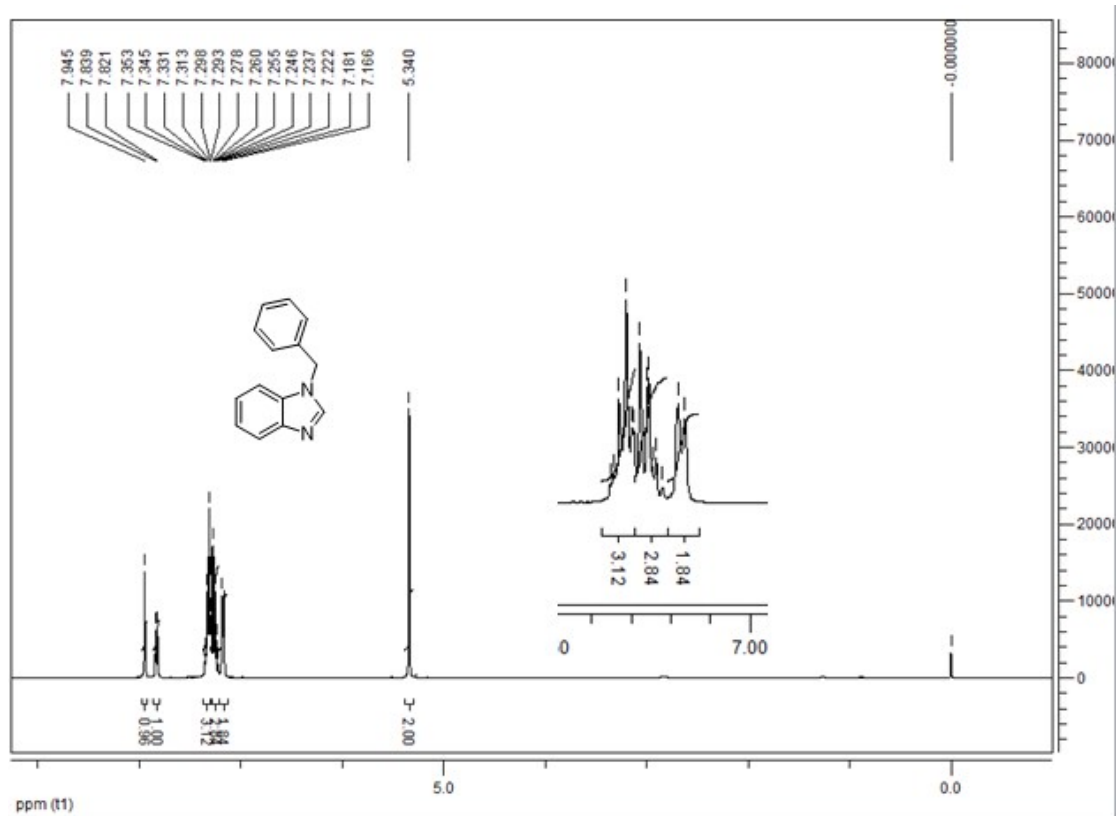

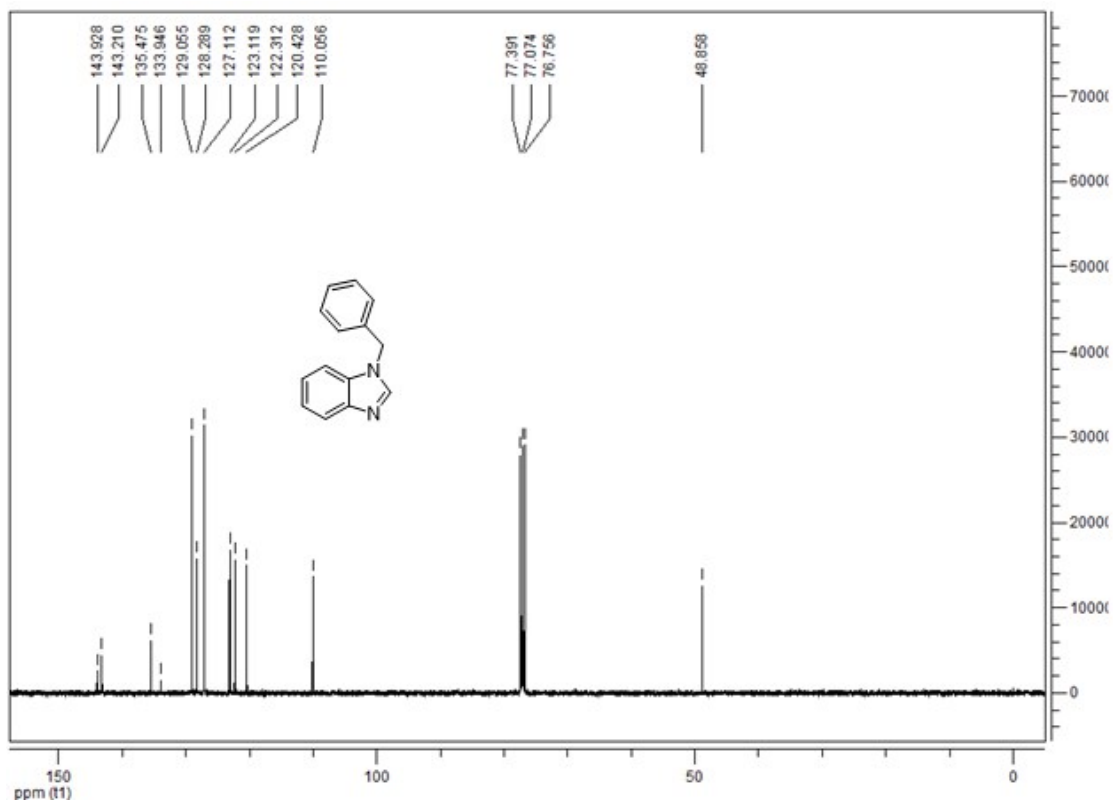

**1-Benzyl-2-methyl-1H-benzo[d]imidazole (3ae)**

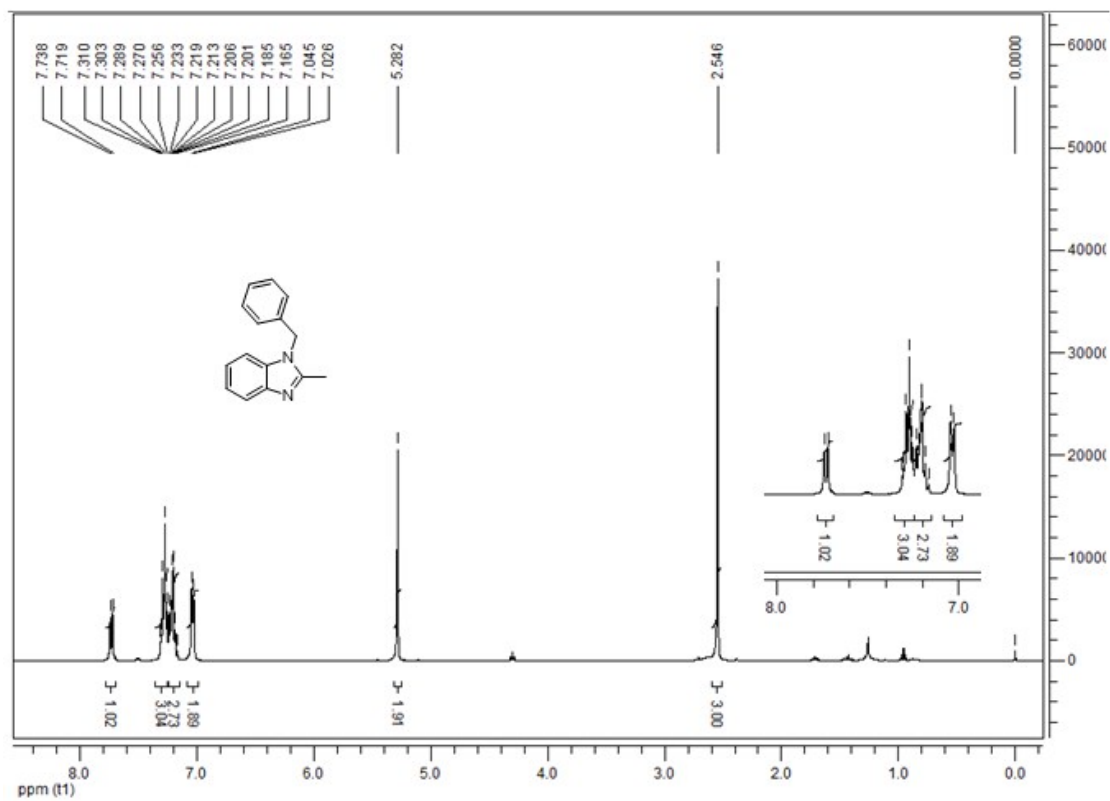



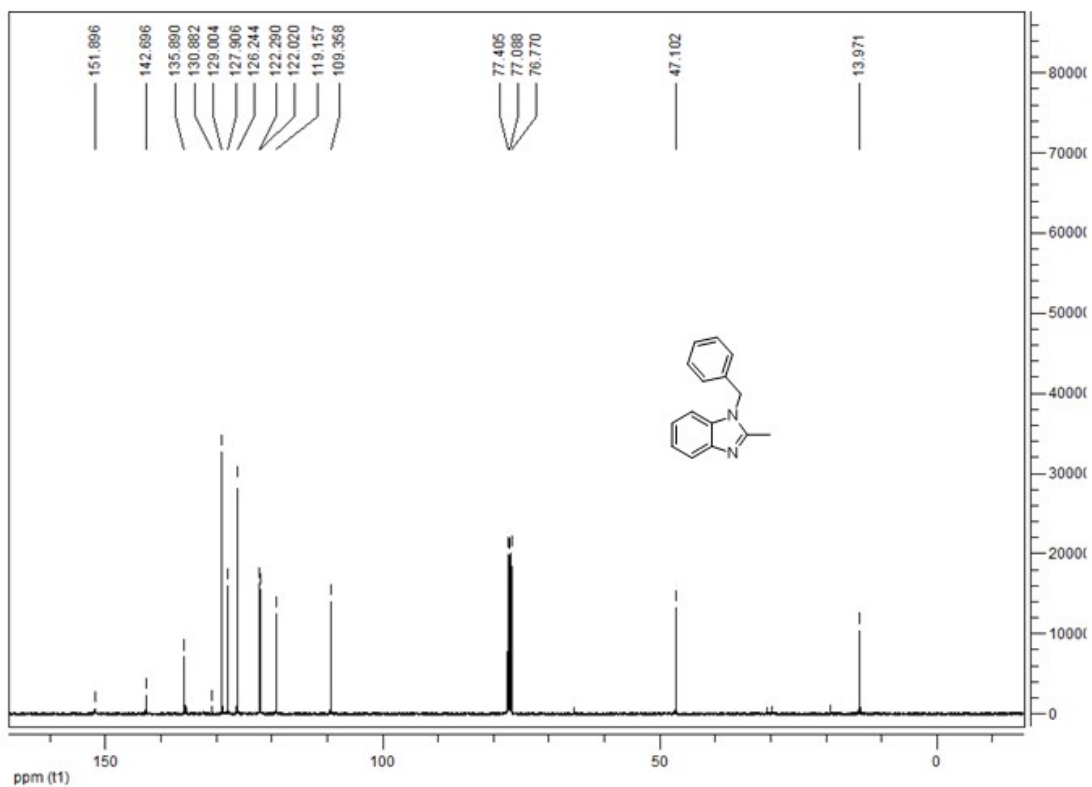

**1-Benzyl-2-ethyl-1H-benzo[d]imidazole (3af)**

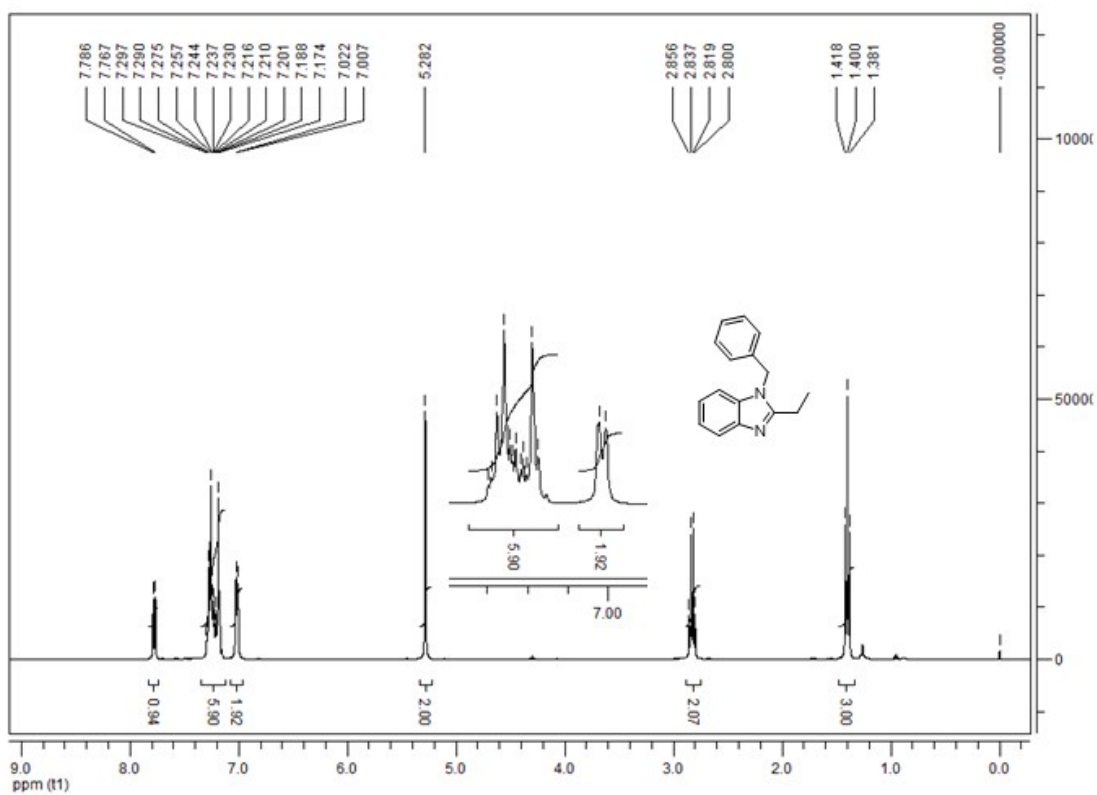

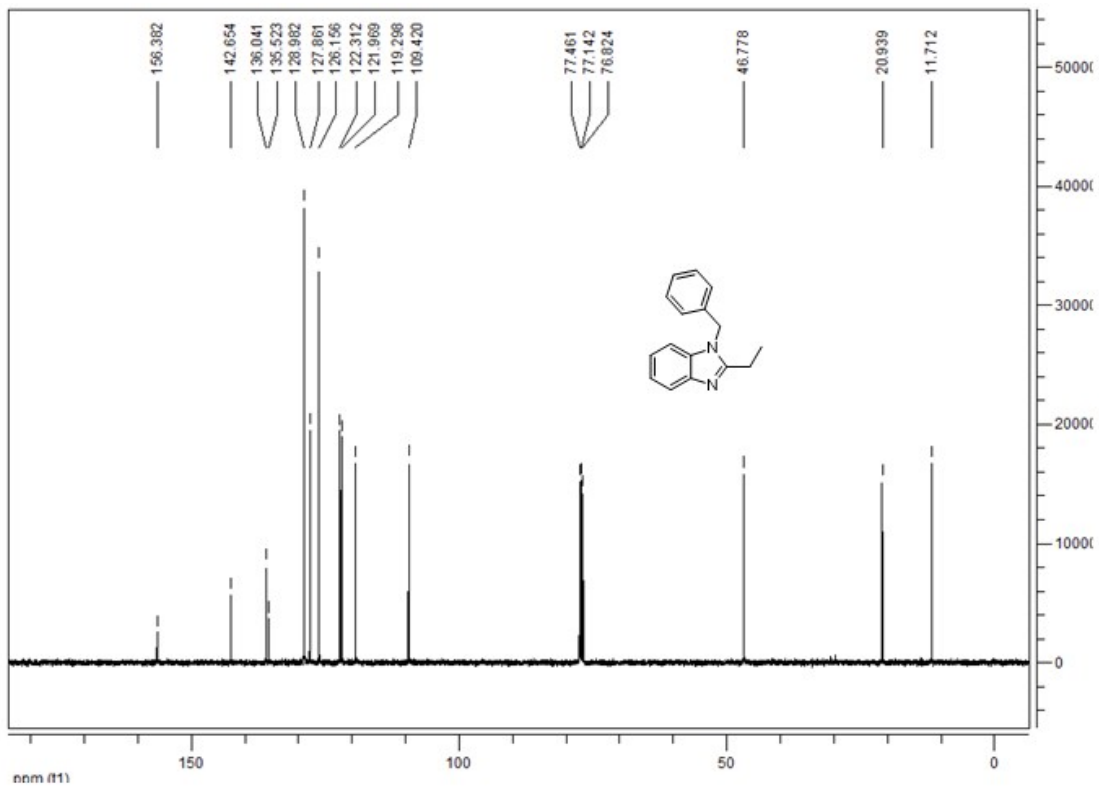

**2-(4-Fluorophenyl)-1-(naphthalen-2-ylmethyl)-1H-benzo[d]imidazole (3qa)**

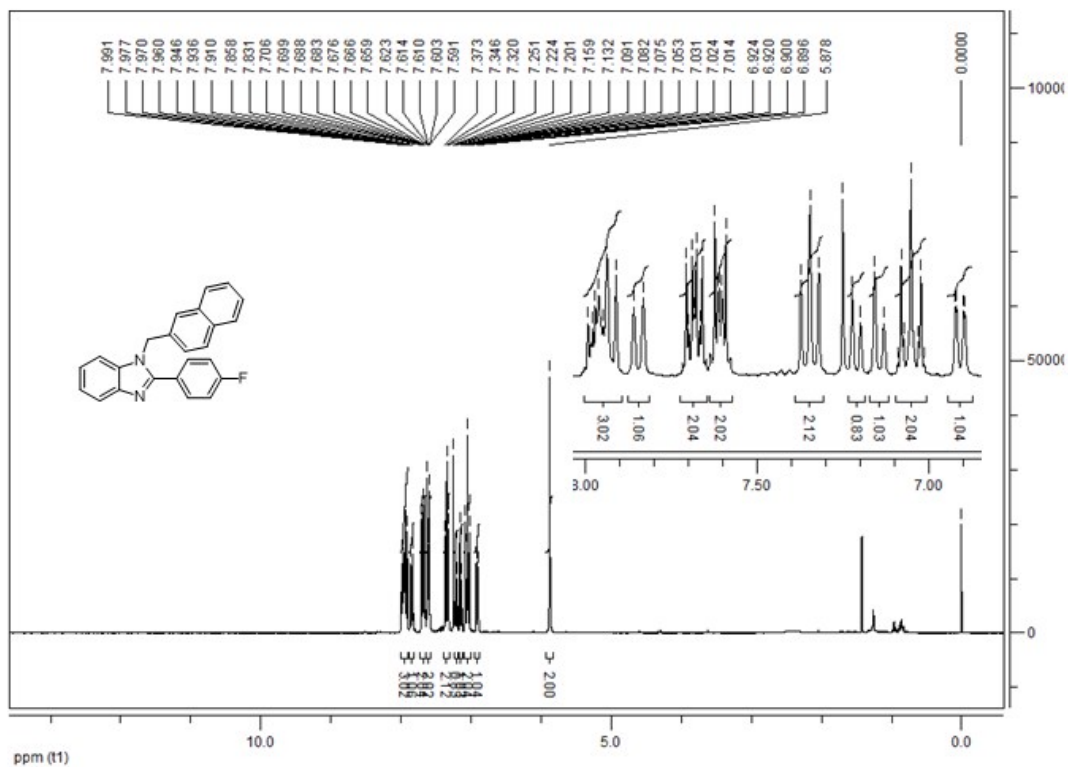

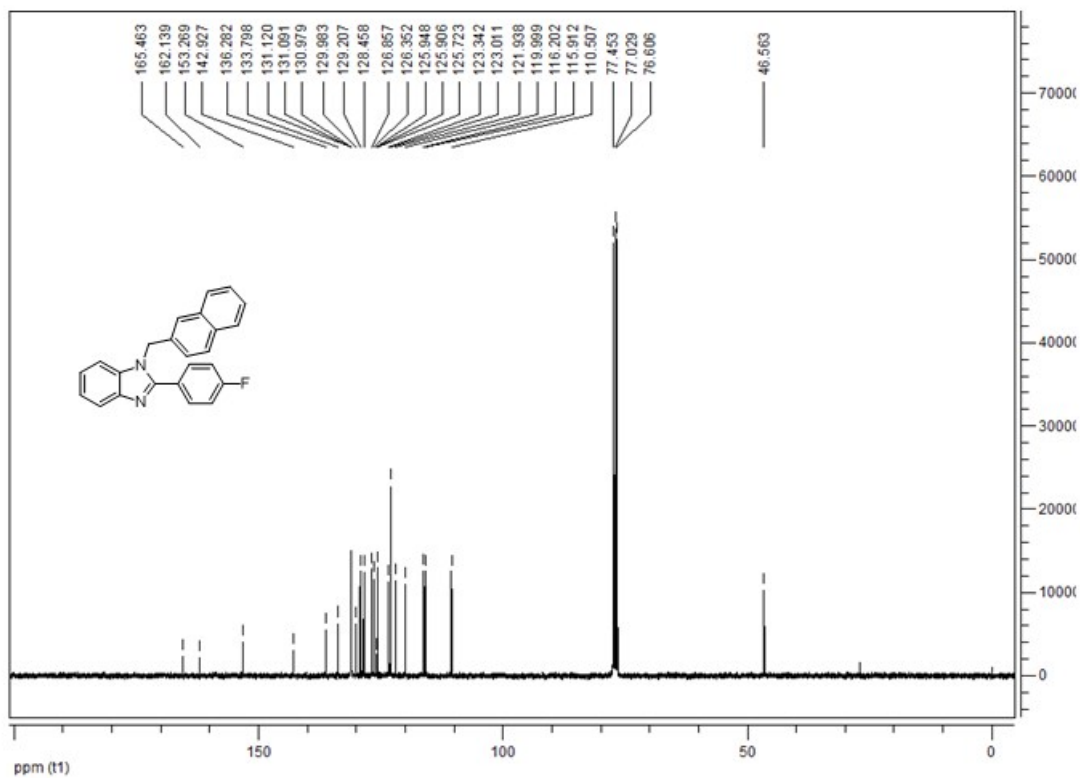

**2-(4-Chlorophenyl)-1-(naphthalen-2-ylmethyl)-1H-benzimidazole (3qb)**

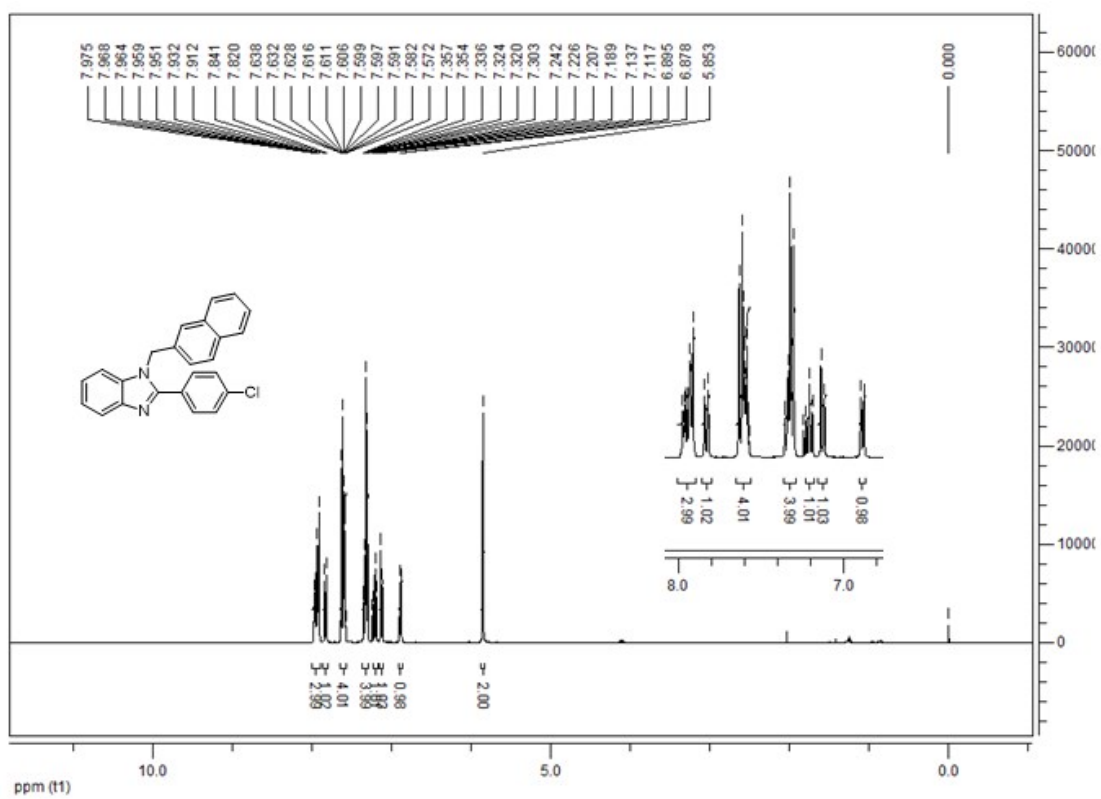

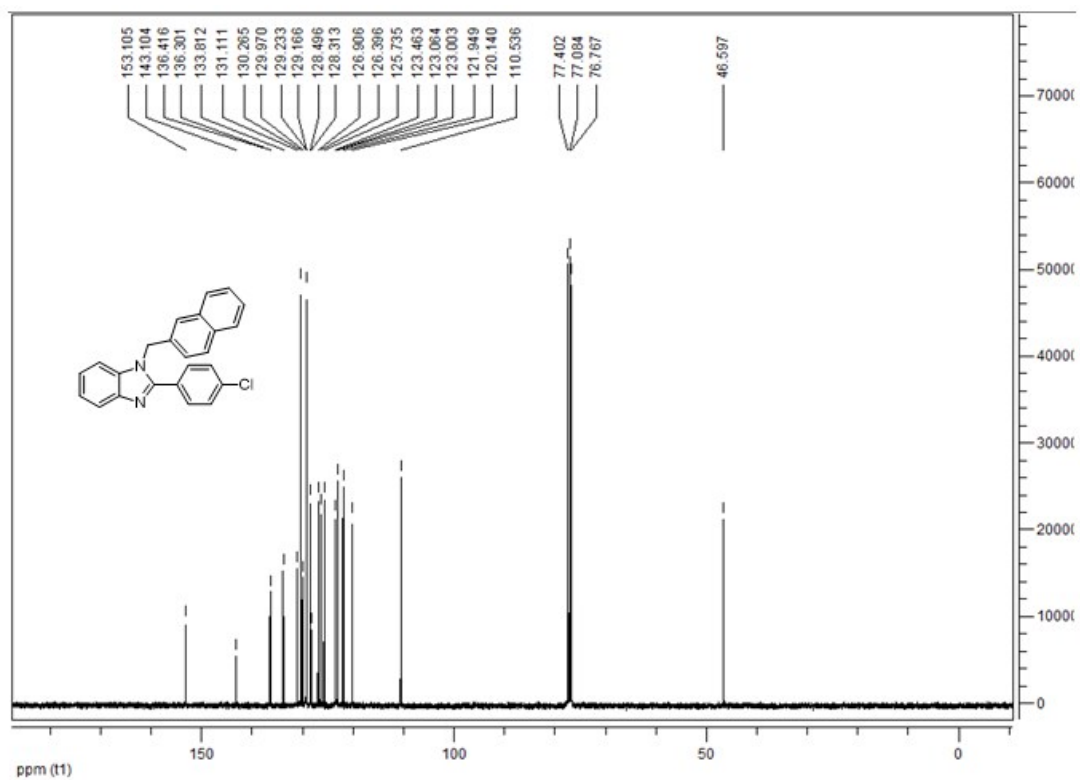

**2-(4-Methoxyphenyl)-1-(naphthalen-2-ylmethyl)-1H-benzo[d]imidazole (3qc)**

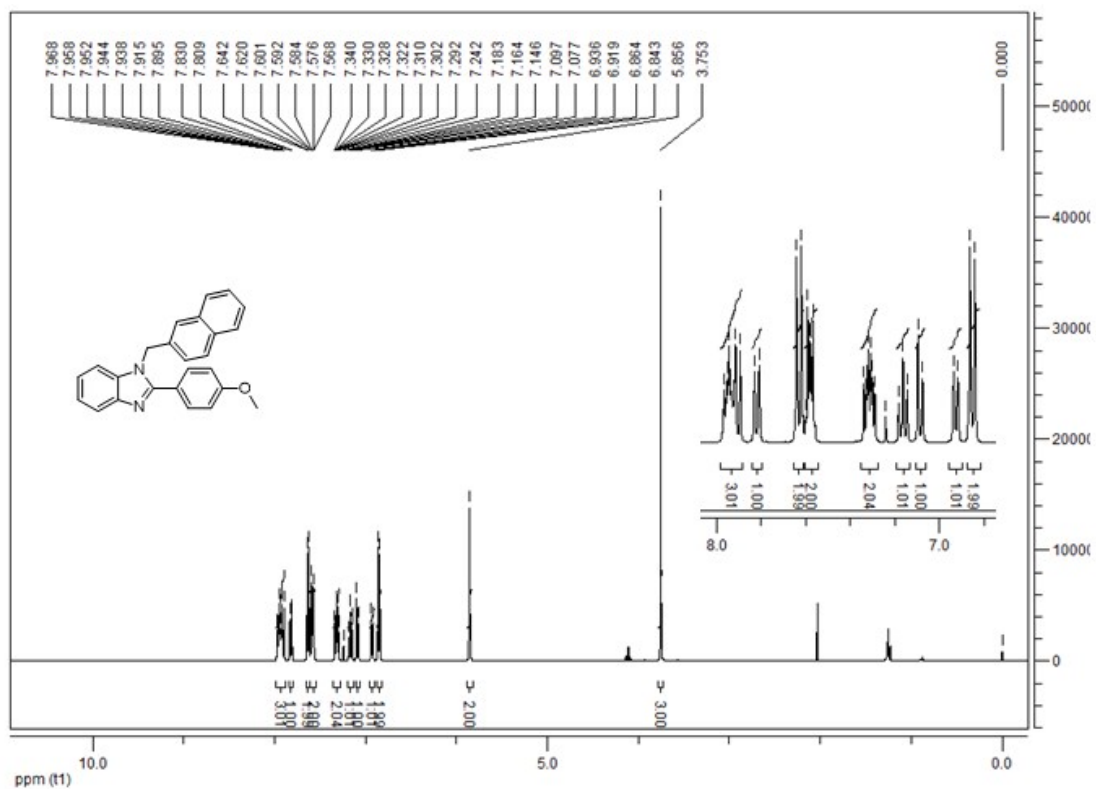

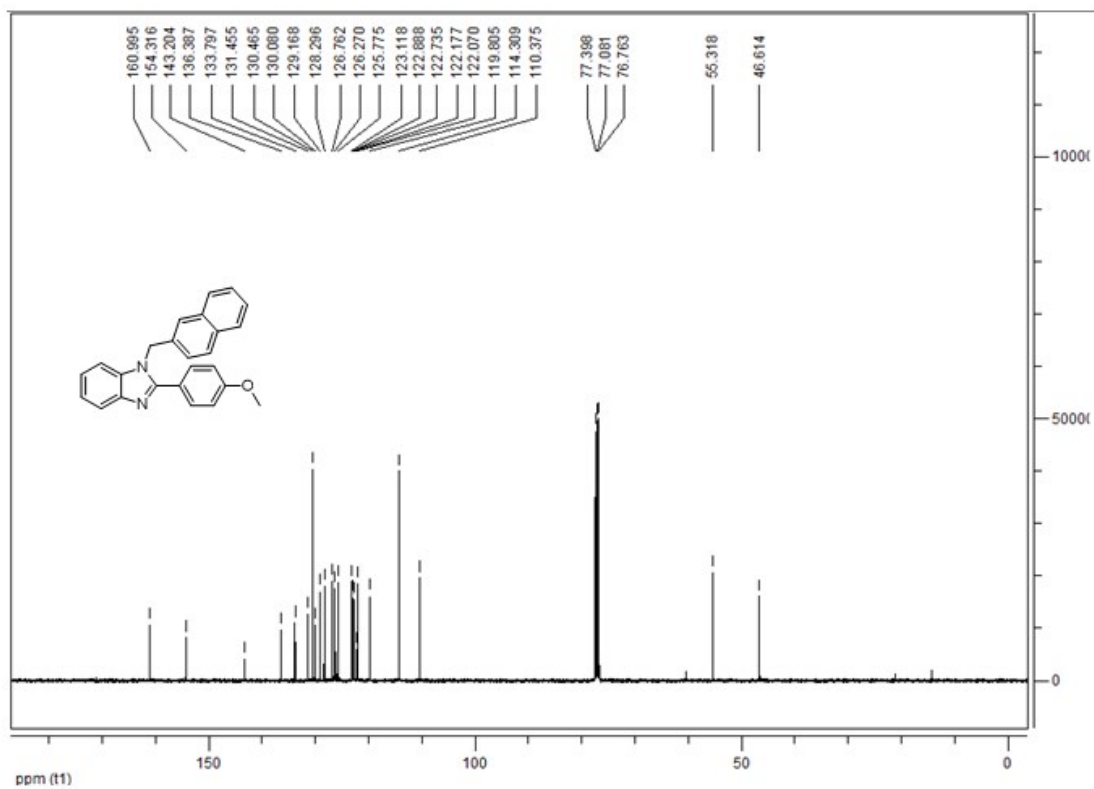

1-([1,1'-Biphenyl]-4-ylmethyl)-2-(4-fluorophenyl)-1H-benzo[d]imidazole (3ra)

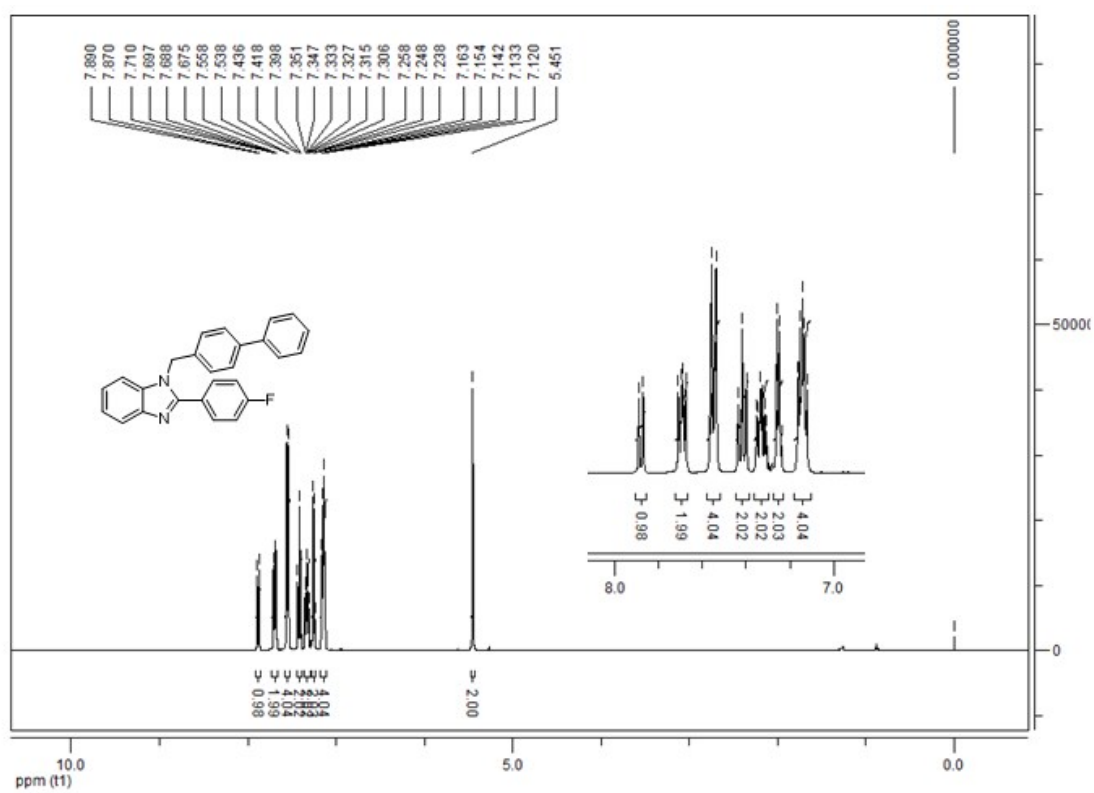

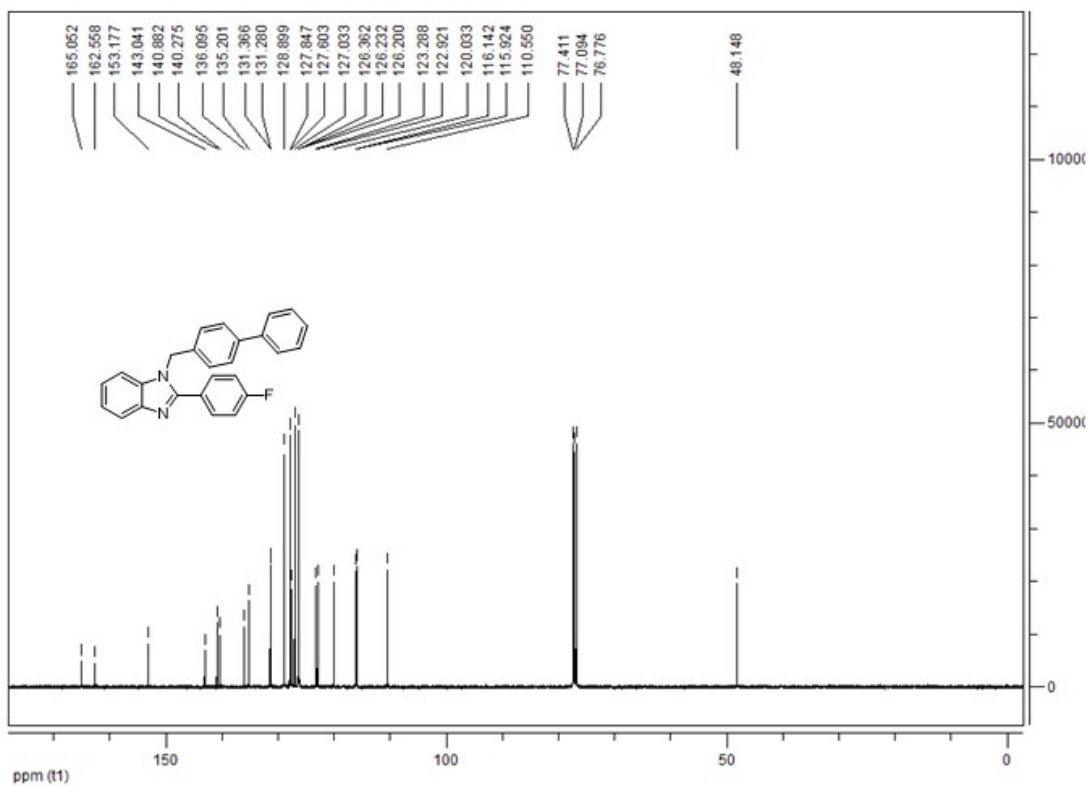

1-([1,1'-Biphenyl]-4-ylmethyl)-2-(4-chlorophenyl)-1H-benzo[d]imidazole (3rb)

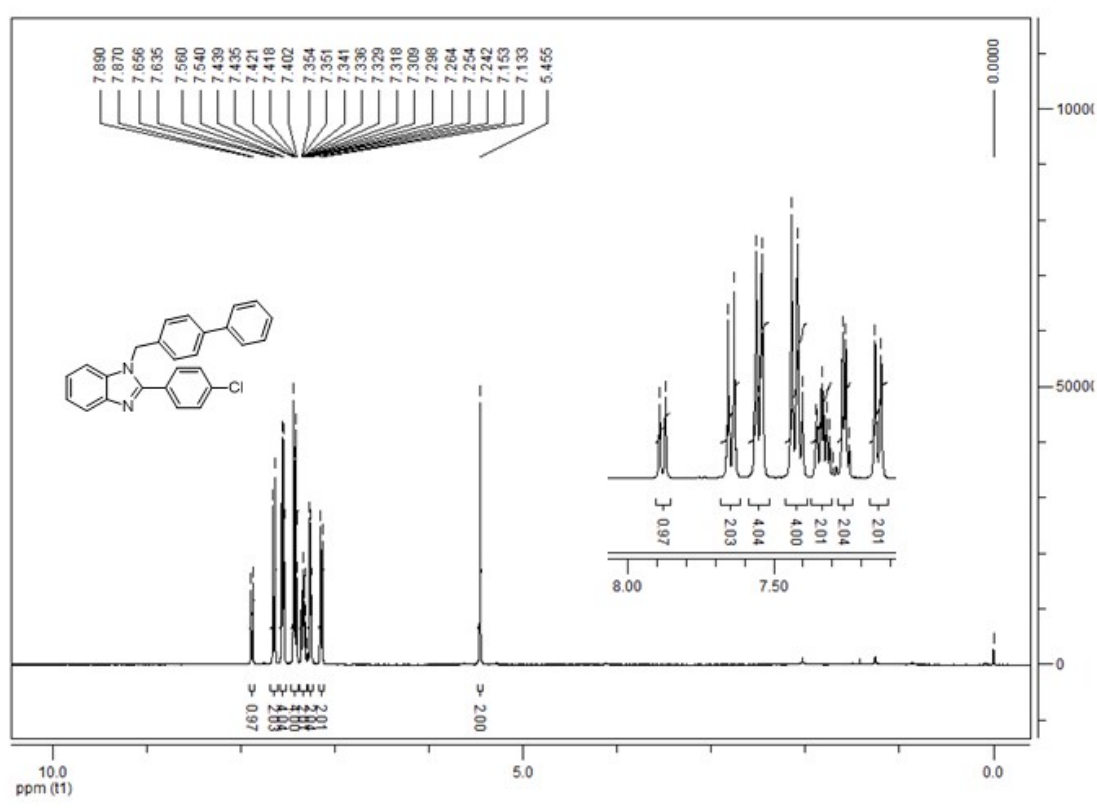

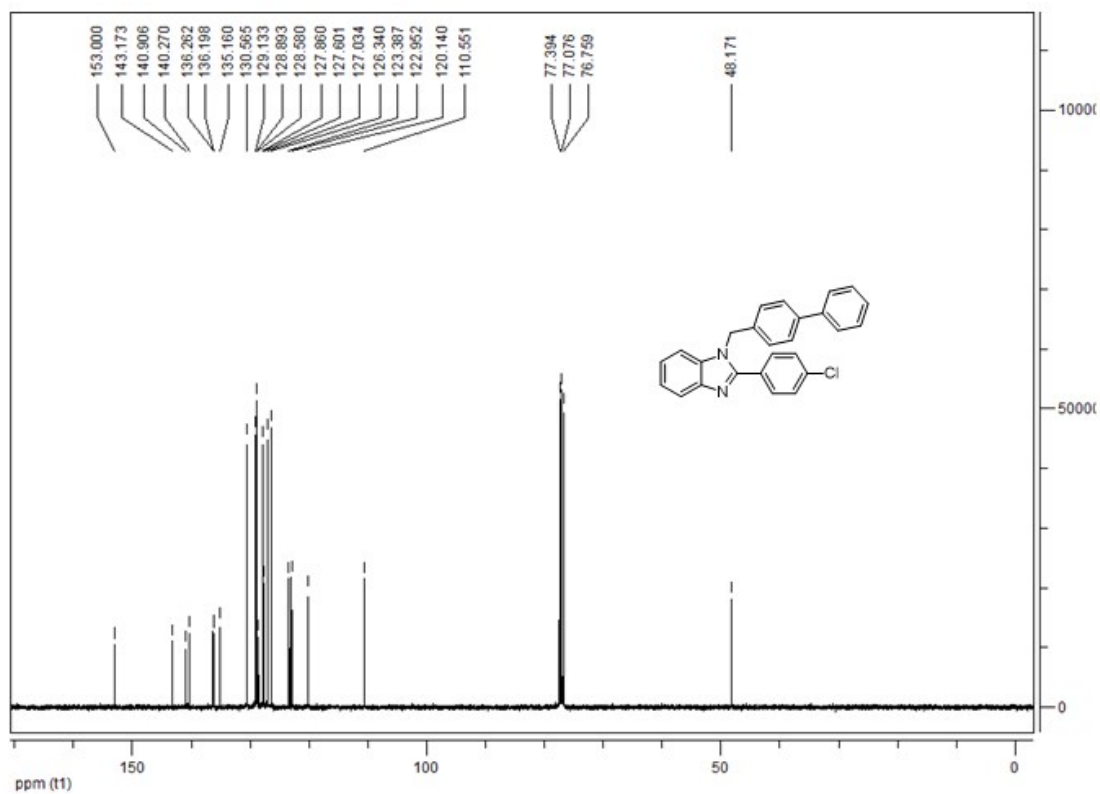

**1-([1,1'-Biphenyl]-4-ylmethyl)-2-(4-methoxyphenyl)-1H-benzo[d]imidazole (3c)**

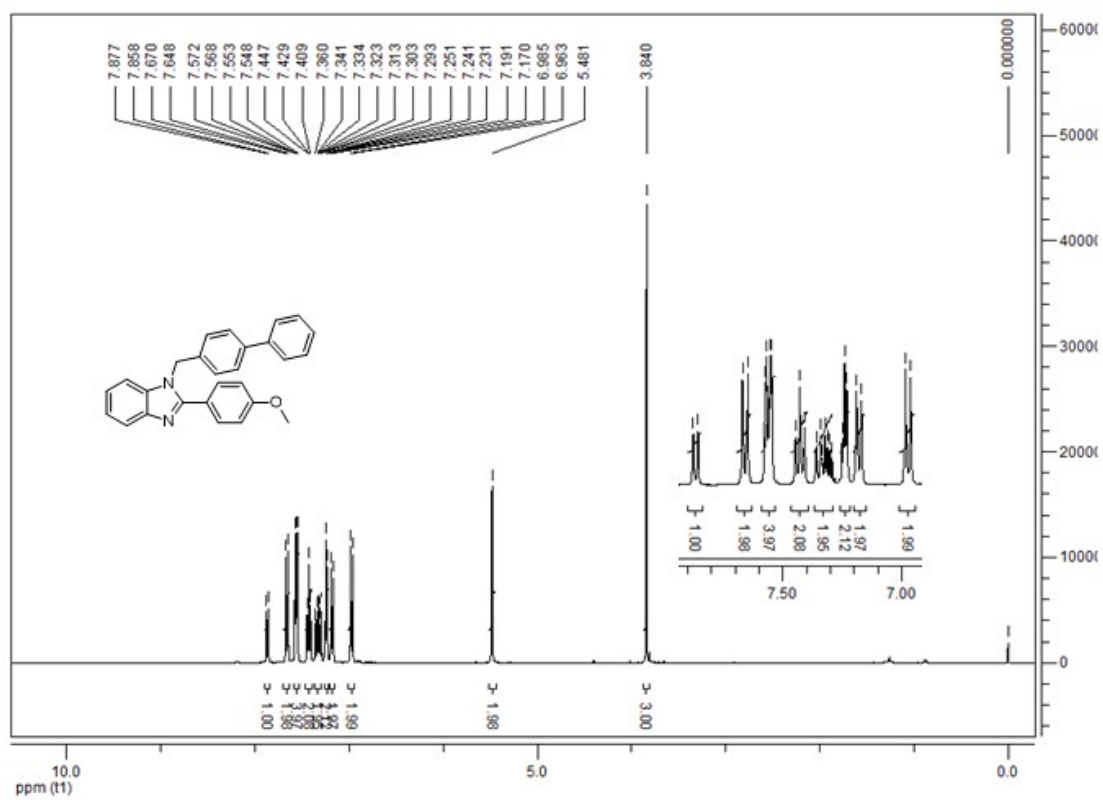

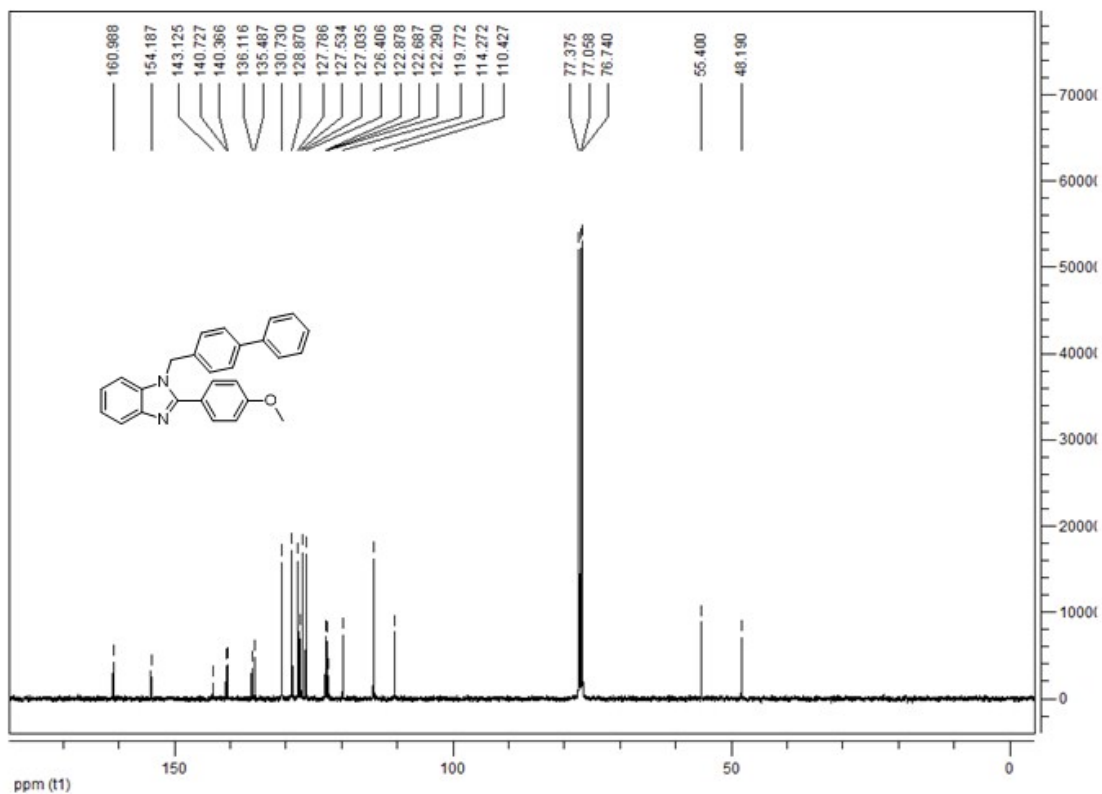

**N-phenylbenzamide (9)**

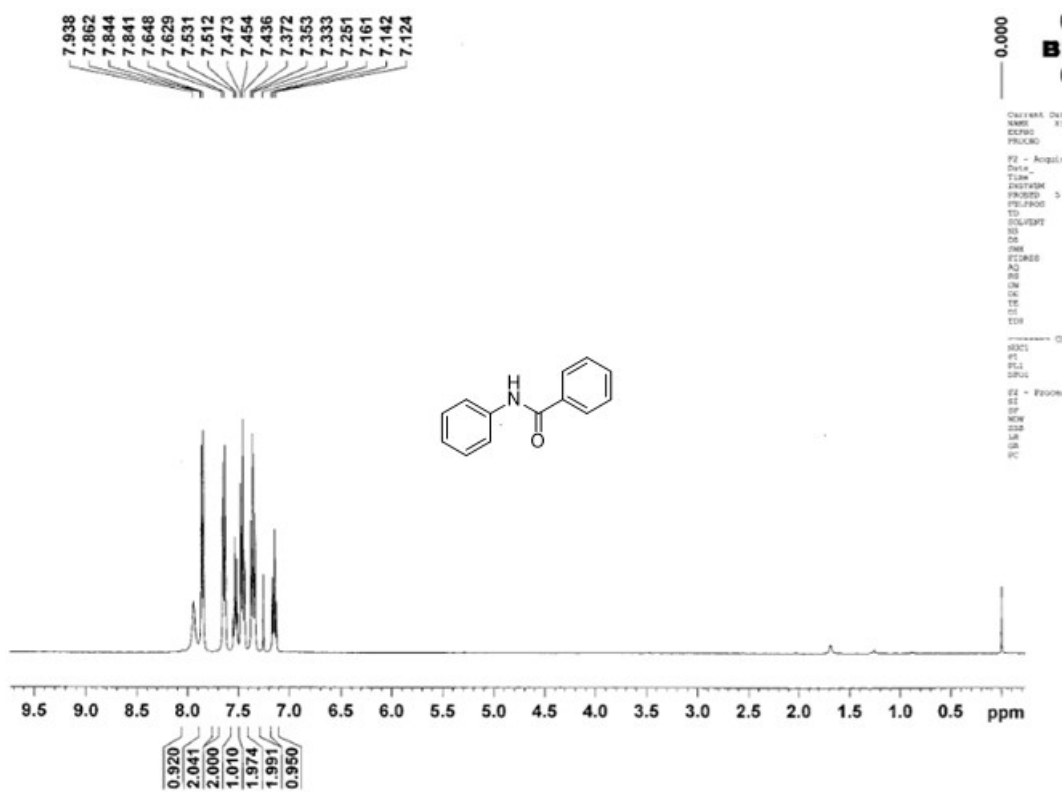



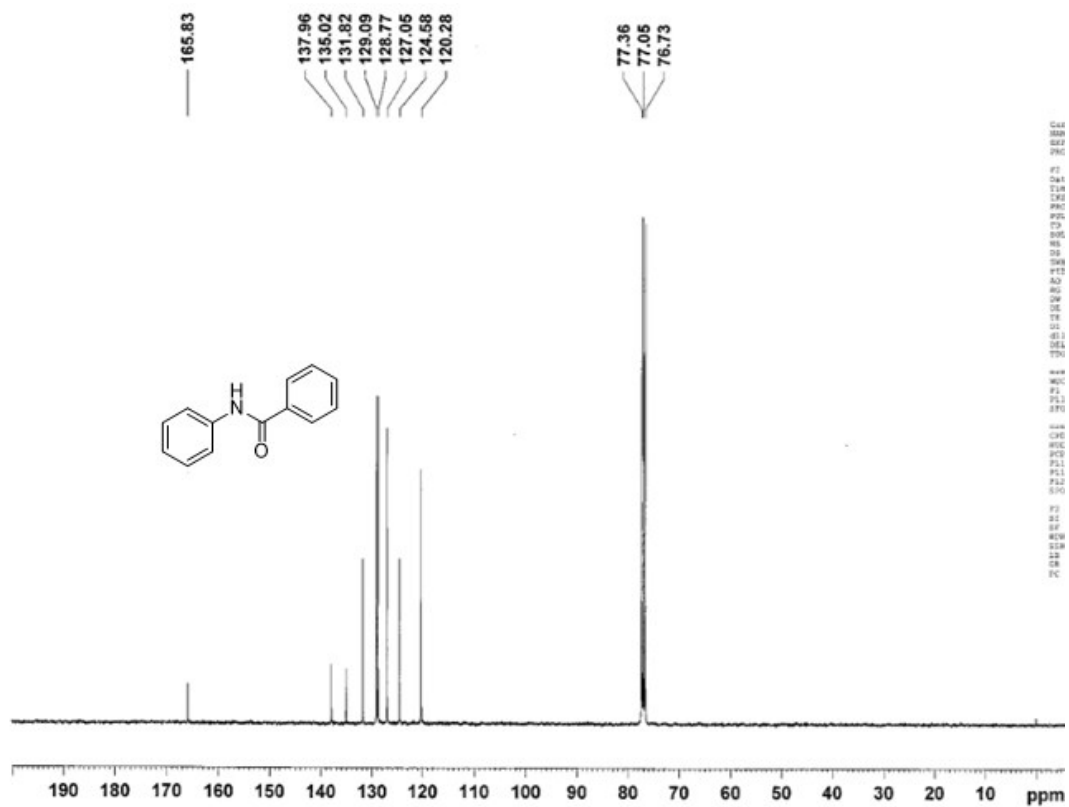

### 3. References

1. P. Dang, W. Zeng and Y. Liang, *Org. Lett.*, 2015, **17**, 34
